# Supplementary material for: Judicious engineering of a metal-free perylene dye for high-efficiency dye sensitized solar cells: the control of excited state and charge carrier dynamics
Source: Royal Society of Chemistry journal article supplement (doi:10.1039/c6ta10506h), 2017-01-01
Supplement: c6ta10506h1.pdf [file c6ta10506h1.pdf]

**Judicious engineering of a metal-free perylene dye for high-efficiency dye sensitized solar cells: the control of excited state and charge carrier dynamics**

Lin Yang,<sup>a</sup> Shu Chen,<sup>bc</sup> Jing Zhang,<sup>a</sup> Junting Wang,<sup>bc</sup> Min Zhang,<sup>\*b</sup> Xiandui Dong<sup>b</sup> and Peng Wang<sup>\*a</sup>

<sup>a</sup> Department of Chemistry, Zhejiang University, Hangzhou, 310028, China. E-mail: [pw2015@zju.edu.cn](mailto:pw2015@zju.edu.cn)

<sup>b</sup> Changchun Institute of Applied Chemistry, Chinese Academy of Sciences, Changchun, 130022, China. E-mail: [min.zhang@ciac.ac.cn](mailto:min.zhang@ciac.ac.cn)

<sup>c</sup> University of Chinese Academy of Sciences, Beijing, 100049, China

## Materials and synthesis

Tris(dibenzylideneacetone)dipalladium ( $\text{Pd}_2(\text{dba})_3$ ), tris(1,1-dimethylethyl)phosphine ( $\text{P}(t\text{-Bu})_3$ ), bis(2',6'-diisopropoxybiphenyl)cyclohexylphosphine (Ruphos), sodium *tert*-butoxide ( $\text{NaOt-Bu}$ ),  $\text{Cs}_2\text{CO}_3$ , and KOH were obtained from Sigma-Aldrich. 1,4-Dioxane, toluene, THF, and ethanol were distilled before use. 4-(4,4-Dihexyl-4*H*-cyclopenta[1,2-*b*:5,4-*b'*]dithiophen-2-yl)-*N,N*-bis(4-(hexyloxy)phenyl)aniline,<sup>S1</sup> butyl 4-(7-ethynylbenzo[*c*][1,2,5]thiadiazol-4-yl)benzoate,<sup>S2</sup> 4-(1-(2-hexyldecyl)-6*b*,10-dihydro-1*H*-phenanthro[1,10,9,8-*cdefg*]carbazol-3-yl)-*N,N*-bis(4-(hexyloxy)phenyl)aniline,<sup>S3</sup> bis(2',4'-bis(hexyloxy)-[1,1'-biphenyl]-4-yl)amine,<sup>S4</sup> and 3-bromo-1-(2-hexyldecyl)-1*H*-phenanthro[1,10,9,8-*cdefg*]carbazole<sup>S5</sup> were prepared according to the correspondent literature methods. Other chemicals were purchased and used without further purification. The synthetic details for **SC1**, **SC2**, and **SC3** are described as follows.

4-(7-((6-(4-(Bis(4-(hexyloxy)phenyl)amino)phenyl)-4,4-dihexyl-4*H*-cyclopenta[1,2-*b*:5,4-*b'*]dithiophen-2-yl)ethynyl)benzo[*c*][1,2,5]thiadiazol-4-yl)benzoic acid (**SC-1**): In a three-neck round bottom flask, 4-(4,4-dihexyl-4*H*-cyclopenta[1,2-*b*:5,4-*b'*]dithiophen-2-yl)-*N,N*-bis(4-(hexyloxy)phenyl)aniline (789 mg, 1.00 mmol) was dissolved with THF (30 mL) before the dropwise addition of NBS (196 mg, 1.10 mmol) in THF (10 mL). The reaction mixture was stirred at RT for 1 h. Water was then added to terminate the reaction and the mixture was extracted three times with chloroform. The organic phase was washed with water and then dried over anhydrous sodium sulfate. After solvent removal under reduced pressure, the residue was purified by column chromatography (toluene/petroleum ether 60–90 °C, *v/v*, 1/40) on silica gel to yield a yellow oil as the desired product 4-(6-bromo-4,4-dihexyl-4*H*-cyclopenta[1,2-*b*:5,4-*b'*]dithiophen-2-yl)-*N,N*-bis(4-(hexyloxy)phenyl)aniline. Then, to a dried Schlenk tube were added 4-(10-bromo-1-(2-hexyldecyl)-1*H*-phenanthro[1,10,9,8-*cdefg*]carbazol-3-yl)-*N,N*-bis(4-(hexyloxy)phenyl)aniline, butyl 4-(7-ethynylbenzo[*c*][1,2,5]thiadiazol-4-yl)benzoate (337 mg, 1.00 mmol),  $\text{Pd}_2(\text{dba})_3$  (34 mg, 0.04 mmol),  $\text{P}(t\text{-Bu})_3$  (0.09 mL, 0.04 mmol, 10 wt% in toluene),  $\text{Cs}_2\text{CO}_3$  (218 mg, 0.66 mmol), and dioxane (10 mL) in a nitrogen-filled glovebox. The reaction mixture was refluxed under argon for 5 h. Water was added and the mixture was extracted three times with chloroform. The organic phase was washed with water and then dried over anhydrous sodium sulfate. After solvent removal under reduced pressure, the residue was purified by column chromatography (toluene/petroleum ether 60–90 °C, *v/v*, 1/1) on silica gel to yield a red solid as the desired butyl ester. Then in a three-neck round bottom flask, the butyl ester and KOH (146 mg, 2.60 mmol) were dissolved in THF/H<sub>2</sub>O (10 mL, *v/v*, 3/1). The mixture was refluxed for 8 h. Water and chloroform were then added. The organic phase was washed with 0.2 M phosphoric acid aqueous solution and water in turn, and then dried over anhydrous sodium sulfate. After removing the solvent under reduced pressure, the crude product was purified by column chromatography (chloroform/methanol, *v/v*, 20/1) on silica gel to yield a black solid as the final product **SC-1** (768 mg, 72% yield). Melting point: 187–189 °C. <sup>1</sup>H NMR (400 MHz, THF-*d*<sub>8</sub>)  $\delta$ : 8.17 (br, 4H), 7.95–7.93 (m, 1H), 7.89 (d, *J* = 7.5 Hz, 1H), 7.49–7.40 (m, 3H), 7.26 (s, 1H), 7.09–7.01 (m, 4H), 6.90–6.88 (m, 3H), 6.85–6.83 (m, 3H), 3.95–3.92 (m, 4H), 2.07–2.02 (m, 4H), 1.37–1.36 (m, 8H), 1.29 (br, 12H), 1.19 (br, 12H), 0.92–0.89 (m, 6H), 0.84–0.80 (m, 6H). <sup>13</sup>C NMR (100 MHz, THF-*d*<sub>8</sub>)  $\delta$ : 167.52, 162.20, 157.08, 156.14, 154.16, 149.64, 148.18, 142.10, 141.55, 141.18, 136.05,

135.96, 134.82, 133.78, 132.57, 131.84, 130.76, 130.36, 130.11, 129.37, 128.17, 127.60, 126.84, 126.11, 121.49, 119.95, 117.31, 116.29, 116.20, 92.57, 68.94, 57.34, 55.21, 39.04, 32.76, 30.86, 30.80, 30.65, 30.50, 37.50, 26.91, 23.70, 14.54. HR-MS (MALDI-TOF)  $m/z$  calcd. for (C<sub>66</sub>H<sub>73</sub>N<sub>3</sub>O<sub>4</sub>S<sub>3</sub>): 1067.47632. Found: 1067.47589. Anal. Calcd. for C<sub>66</sub>H<sub>73</sub>N<sub>3</sub>O<sub>4</sub>S<sub>3</sub>: C, 74.19; H, 6.89; N, 3.93. Found: C, 74.17; H, 6.92; N, 3.91%.

*4-(7-((10-(4-(Bis(4-(hexyloxy)phenyl)amino)phenyl)-1-(2-hexyldecyl)-1H-phenanthro[1,10,9,8-cdefg]carbazol-3-yl)ethynyl)benzo[c][1,2,5]thiadiazol-4-yl)benzoic acid (SC-2)*: In a three-neck round bottom flask, 4-(1-(2-hexyldecyl)-6b,10-dihydro-1H-phenanthro[1,10,9,8-cdefg]carbazol-3-yl)-N,N-bis(4-(hexyloxy)phenyl)aniline (1.13 g, 1.21 mmol) was dissolved with THF (30 mL). The solution was cooled to 0 °C by use of an ice salt bath before the dropwise addition of NBS (216 mg, 1.21 mmol) in THF (10 mL). The reaction mixture was stirred at 0 °C for 0.5 h. Water was then added to terminate the reaction and the mixture was extracted three times with chloroform. The organic phase was washed with water and then dried over anhydrous sodium sulfate. After solvent removal under reduced pressure, the residue was purified by column chromatography (toluene/petroleum ether 60–90 °C,  $v/v$ , 1/50) on silica gel to yield a yellow oil as the desired product 4-(10-bromo-1-(2-hexyldecyl)-1H-phenanthro[1,10,9,8-cdefg]carbazol-3-yl)-N,N-bis(4-(hexyloxy)phenyl)aniline. Then, to a dried Schlenk tube were added 4-(10-bromo-1-(2-hexyldecyl)-1H-phenanthro[1,10,9,8-cdefg]carbazol-3-yl)-N,N-bis(4-(hexyloxy)phenyl)aniline, butyl 4-(7-ethynylbenzo[c][1,2,5]thiadiazol-4-yl)benzoate (199 mg, 0.59 mmol), Pd<sub>2</sub>(dba)<sub>3</sub> (17 mg, 0.02 mmol), P(*t*-Bu)<sub>3</sub> (0.045 mL, 0.02 mmol, 10 wt% in toluene), Cs<sub>2</sub>CO<sub>3</sub> (108 mg, 0.33 mmol), and dioxane (10 mL) in a nitrogen-filled glovebox. The reaction mixture was refluxed under argon for 5 h. Water was added and the mixture was extracted three times with chloroform. The organic phase was washed with water and then dried over anhydrous sodium sulfate. After solvent removal under reduced pressure, the residue was purified by column chromatography (toluene/petroleum ether 60–90 °C,  $v/v$ , 1/1) on silica gel to yield a red solid as the desired butyl ester. Then in a three-neck round bottom flask, the butyl ester and KOH (146 mg, 2.60 mmol) were dissolved in THF/H<sub>2</sub>O (10 mL,  $v/v$ , 3/1). The mixture was stirred refluxed under argon for 8 h. Water and chloroform were then added. The organic phase was washed with 0.2 M phosphoric acid aqueous solution and water in turn, and then dried over anhydrous sodium sulfate. After removing the solvent under reduced pressure, the crude product was purified by column chromatography (chloroform/methanol,  $v/v$ , 20/1) on silica gel to yield a black solid as the final product **SC-2** (306 mg, 76% yield). Melting point: 205–208 °C. <sup>1</sup>H NMR (400 MHz, THF-*d*<sub>8</sub>)  $\delta$ : 8.89–8.81 (m, 1H), 8.75–8.66 (m, 2H), 8.18–8.17 (m, 5H), 8.10–8.03 (m, 1H), 7.97–7.86 (m, 3H), 7.79–7.69 (m, 2H), 7.52 (d,  $J$  = 8.4 Hz, 2H), 7.15 (d,  $J$  = 8.8 Hz, 4H), 7.09 (d,  $J$  = 8.4 Hz, 2H), 6.89 (d,  $J$  = 8.8 Hz, 4H), 4.62–4.45 (m, 2H), 3.96 (t,  $J$  = 6.2 Hz, 4H), 2.10–2.00 (m, 1H), 1.82–1.72 (m, 4H), 1.52–1.49 (m, 4H), 1.38–1.37 (m, 12H), 1.29 (br, 6H), 1.16–1.13 (m, 14H), 0.95–0.87 (m, 6H), 0.78–0.75 (m, 6H). <sup>13</sup>C NMR (100 MHz, THF-*d*<sub>8</sub>)  $\delta$ : 167.47, 157.22, 156.13, 153.74, 150.40, 141.77, 140.42, 133.31, 132.99, 132.38, 131.47, 130.40, 129.70, 128.94, 128.04, 119.03, 118.29, 115.97, 113.75, 98.31, 85.28, 68.58, 36.04, 33.68, 32.65, 32.37, 30.50, 30.43, 30.33, 30.26, 30.24, 30.09, 27.82, 26.53, 26.23, 23.33, 17.02, 14.27, 14.23. HR-MS (MALDI-TOF)  $m/z$  calcd. for (C<sub>81</sub>H<sub>86</sub>N<sub>4</sub>O<sub>4</sub>S): 1210.63698. Found: 1210.63725. Anal. Calcd. for C<sub>81</sub>H<sub>86</sub>N<sub>4</sub>O<sub>4</sub>S: C, 80.29; H, 7.15; N, 4.62. Found: C, 80.27; H, 7.13; N, 4.65%.

*N,N*-Bis(2',4'-bis(hexyloxy)-[1,1'-biphenyl]-4-yl)-1-(2-hexyldecyl)-1*H*-phenanthro[1,10,9,8-*cdefg*]carbazol-3-amine: To a dried Schlenk tube bis(2',4'-bis(hexyloxy)-[1,1'-biphenyl]-4-yl)amine (1.44 g, 2.00 mmol), 3-bromo-1-(2-hexyldecyl)-1*H*-phenanthro[1,10,9,8-*cdefg*]carbazole (1.14 g, 2.00 mmol), Pd<sub>2</sub>(dba)<sub>3</sub> (82 mg, 0.09 mmol), RuPhos (84 mg, 0.18 mmol), Na*O**t*-Bu (0.96 g, 10.00 mmol), and toluene (20 mL) were added in the nitrogen-filled glovebox. The reaction mixture was refluxed under argon for 24 h and then cooled to room temperature. Water was added to terminate the reaction. The resultant mixture was extracted three times with chloroform before the organic phase was washed with water and dried over anhydrous sodium sulfate. After solvent removal under reduced pressure, the residue was purified by column chromatography over silica gel with toluene/petroleum ether (*v/v*, 1/2) as eluent to afford a yellow oil as the desired product (1.84 g, 76% yield). <sup>1</sup>H NMR (400 MHz, THF-*d*<sub>8</sub>)  $\delta$ : 8.70–8.67 (m, 2H), 8.11–8.08 (m, 2H), 7.91–7.86 (m, 3H), 7.79–7.75 (m, 1H), 7.69–7.65 (m, 1H), 7.39 (d, *J* = 8.8 Hz, 4H), 7.21–7.18 (m, 6H), 6.55 (d, *J* = 2.3 Hz, 2H), 6.51–6.50 (m, 1H), 6.49–6.48 (m, 1H), 4.62 (d, *J* = 7.3 Hz, 2H), 3.96–3.91 (m, 8H), 2.25 (br, 1H), 1.50–1.49 (m, 4H), 1.41–1.35 (m, 18H), 1.29–1.26 (m, 12H), 1.17–1.15 (m, 18H), 0.93–0.90 (m, 7H), 0.84–0.81 (m, 6H), 0.79–0.75 (m, 6H). <sup>13</sup>C NMR (100 MHz, CDCl<sub>3</sub>)  $\delta$ : 159.54, 157.17, 141.18, 138.08, 132.74, 131.10, 130.96, 130.87, 130.17, 129.25, 128.83, 128.44, 128.01, 127.88, 125.51, 124.95, 124.85, 123.45, 121.22, 121.11, 116.11, 105.49, 104.43, 100.68, 68.61, 68.29, 56.12, 50.42, 40.18, 32.08, 32.05, 31.94, 31.83, 31.66, 30.09, 29.79, 29.67, 29.53, 29.42, 29.27, 26.70, 25.98, 25.92, 22.83, 22.80, 22.74, 14.25, 14.23, 14.20. HR-MS (MALDI-TOF) *m/z* calcd. for (C<sub>84</sub>H<sub>108</sub>N<sub>2</sub>O<sub>4</sub>): 1208.83091. Found: 1208.83052. Anal. Calcd. for C<sub>84</sub>H<sub>108</sub>N<sub>2</sub>O<sub>4</sub>: C, 83.40; H, 9.00; N, 2.32. Found: C, 83.42; H, 8.89; N, 2.34%.

4-(7-((10-Bis(2',4'-bis(hexyloxy)-[1,1'-biphenyl]-4-yl)amino)-1-(2-hexyldecyl)-1*H*-phenanthro[1,10,9,8-*cdefg*]carbazol-3-yl)ethynyl)benzo[*c*][1,2,5]thiadiazol-4-yl)benzoic acid (**SC-3**): In a three-neck round bottom flask, *N,N*-bis(2',4'-bis(hexyloxy)-[1,1'-biphenyl]-4-yl)-1-(2-hexyldecyl)-1*H*-phenanthro[1,10,9,8-*cdefg*]carbazol-3-amine (604 mg, 0.50 mmol) was dissolved with THF (40 mL). The solution was cooled to –10 °C by use of an ice salt bath before the dropwise addition of NBS (89 mg, 0.50 mmol) in THF (10 mL). The reaction mixture was stirred at –10 °C for 0.5 h. Water was then added to terminate the reaction and the mixture was extracted three times with chloroform. The organic phase was washed with water and then dried over anhydrous sodium sulfate. After solvent removal under reduced pressure, the residue was purified by column chromatography (toluene/petroleum ether 60–90 °C, *v/v*, 1/50) on silica gel to yield a yellow oil as the desired product *N,N*-bis(2',4'-bis(hexyloxy)-[1,1'-biphenyl]-4-yl)-10-bromo-1-(2-hexyldecyl)-1*H*-phenanthro[1,10,9,8-*cdefg*]carbazol-3-amine. Then, to a dried Schlenk tube were added *N,N*-bis(2',4'-bis(hexyloxy)-[1,1'-biphenyl]-4-yl)-10-bromo-1-(2-hexyldecyl)-1*H*-phenanthro[1,10,9,8-*cdefg*]carbazol-3-amine, butyl 4-(7-ethynylbenzo[*c*][1,2,5]thiadiazol-4-yl)benzoate (200 mg, 0.58 mmol), Pd<sub>2</sub>(dba)<sub>3</sub> (18 mg, 0.02 mmol), P(*t*-Bu)<sub>3</sub> (0.046 mL, 0.02 mmol, 10 wt% in toluene), Cs<sub>2</sub>CO<sub>3</sub> (112 mg, 0.34 mmol), and dioxane (15 mL) in a nitrogen-filled glovebox. The reaction mixture was refluxed under argon overnight. Water was added and the mixture was extracted three times with chloroform. The organic phase was washed with water and then dried over anhydrous sodium sulfate. After solvent removal under reduced pressure, the residue was purified by column chromatography (toluene/petroleum ether 60–90 °C, *v/v*, 1/1) on silica gel to yield a red solid as the desired butyl ester. Then in a three-neck round bottom flask, butyl ester and KOH (152 mg, 2.61 mmol) were dissolved in THF/H<sub>2</sub>O (12

mL, v/v, 3/1). The mixture was stirred at reflux overnight. Water and chloroform were then added. The organic phase was washed with 0.2 M phosphoric acid aqueous solution and water in turn, and then dried over anhydrous sodium sulfate. After removing the solvent under reduced pressure, the crude product was purified by column chromatography (chloroform/methanol, v/v, 20/1) on silica gel to yield a black solid as the final product **SC-3** (528 mg, 71% yield). Melting point: 178–191 °C. <sup>1</sup>H NMR (500 MHz, THF-*d*<sub>6</sub>) δ: 8.90 (d, *J* = 8.2 Hz, 1H), 8.78 (d, *J* = 7.6 Hz, 1H), 8.73 (d, *J* = 7.6 Hz, 1H), 8.29 (s, 1H), 8.23–8.19 (m, 4H), 8.11 (d, *J* = 8.3 Hz, 1H), 8.06 (d, *J* = 7.3 Hz, 1H), 8.00–7.96 (m, 2H), 7.91 (s, 1H), 7.72–7.69 (m, 1H), 7.42 (d, *J* = 8.7 Hz, 4H), 7.23–7.19 (m, 6H), 6.55 (d, *J* = 2.3 Hz, 2H), 6.51 (d, *J* = 2.3 Hz, 1H), 6.50 (d, *J* = 2.3 Hz, 1H), 4.65 (d, *J* = 7.3 Hz, 2H), 3.97–3.93 (m, 8H), 2.28 (br, 1H), 1.79–1.74 (m, 4H), 1.50–1.47 (m, 4H), 1.43–1.34 (m, 20H), 1.29–1.26 (m, 6H), 1.18–1.12 (m, 16H), 0.93–0.90 (m, 9H), 0.84–0.81 (m, 6H), 0.77–0.74 (m, 6H). <sup>13</sup>C NMR (150 MHz, THF-*d*<sub>6</sub>) δ: 167.87, 160.77, 158.15, 156.74, 154.25, 148.09, 143.86, 142.13, 135.47, 133.85, 133.69, 133.32, 132.89, 132.76, 131.78, 131.65, 131.52, 131.47, 131.02, 130.83, 130.79, 130.13, 129.75, 129.46, 128.95, 126.56, 125.96, 125.38, 125.04, 124.56, 124.06, 122.64, 122.44, 122.12, 119.49, 119.34, 118.59, 116.78, 116.71, 116.60, 106.37, 101.32, 98.55, 91.05, 69.16, 68.70, 50.79, 41.05, 40.08, 32.98, 32.89, 32.82, 32.77, 32.60, 31.55, 31.08, 30.80, 30.78, 30.62, 30.47, 30.27, 30.04, 27.50, 26.91, 26.86, 23.70, 23.63, 14.58. HR-MS (MALDI-TOF) *m/z* calcd. for (C<sub>99</sub>H<sub>114</sub>N<sub>4</sub>O<sub>6</sub>S): 1487.84926. Found: 1487.84911. Anal. Calcd. for C<sub>99</sub>H<sub>114</sub>N<sub>4</sub>O<sub>6</sub>S: C, 79.91; H, 7.72; N, 3.77. Found: C, 79.93; H, 7.70; N, 3.76%.

## References

- S1 M. Zhang, Y. Wang, M. Xu, W. Ma, R. Li and P. Wang, *Energy Environ. Sci.*, 2013, **6**, 2944.
- S2 L. Yang, Y. Ren, Z. Yao, C. Yan, W. Ma and P. Wang, *J. Phys. Chem. C*, 2015, **119**, 980.
- S3 Y. Ren, Y. Li, S. Chen, J. Liu, J. Zhang and P. Wang, *Energy Environ. Sci.*, 2016, **9**, 1390.
- S4 J.-H. Yum, T. W. Holcombe, Y. Kim, J. Yoon, K. Rakstys, M. K. Nazeeruddin and M. Grätzel, *Chem. Commun.*, 2012, **48**, 10727.
- S5 Y. Li and Z. Wang, *Org. Lett.*, 2009, **11**, 1385.

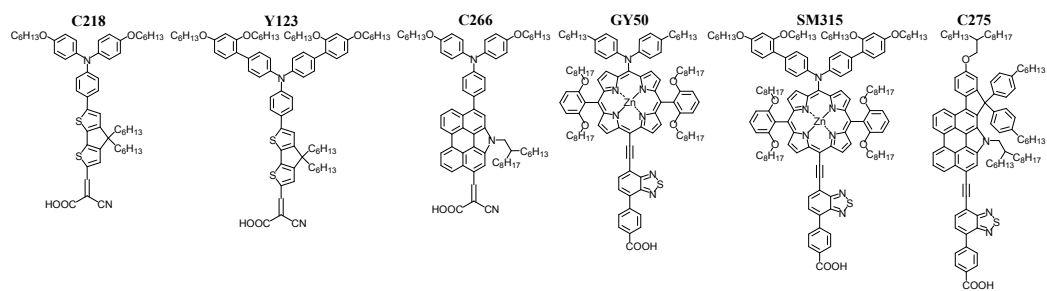

**Fig. S1.** Molecular structures of **C218**, **Y123**, **C266**, **GY50**, **SM315**, and **C275**.

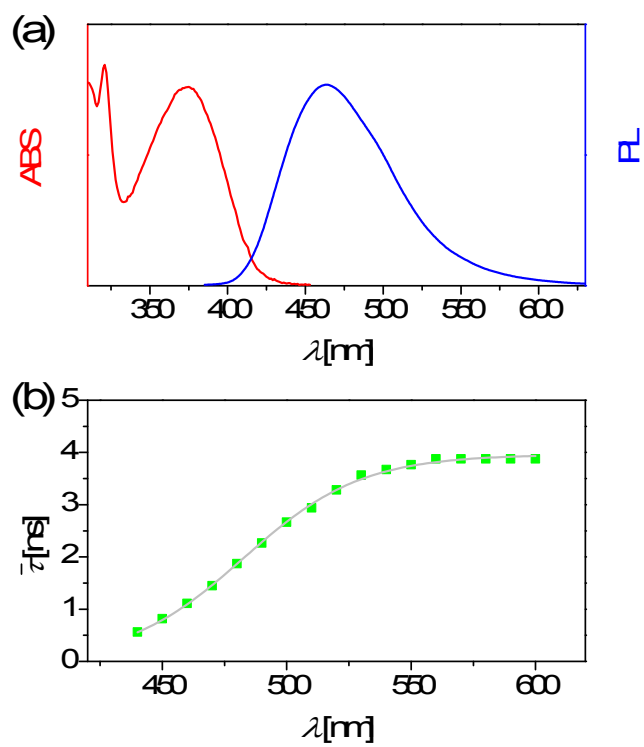

**Fig. S2.** (a) Electronic absorption and PL spectra of 50  $\mu\text{M}$  of EBTBA in THF. (b) Wavelength-dependent average time constants ( $\bar{\tau}$ ) for EBTBA dissolved in THF. The solid line was shown as a guide to the eyes.

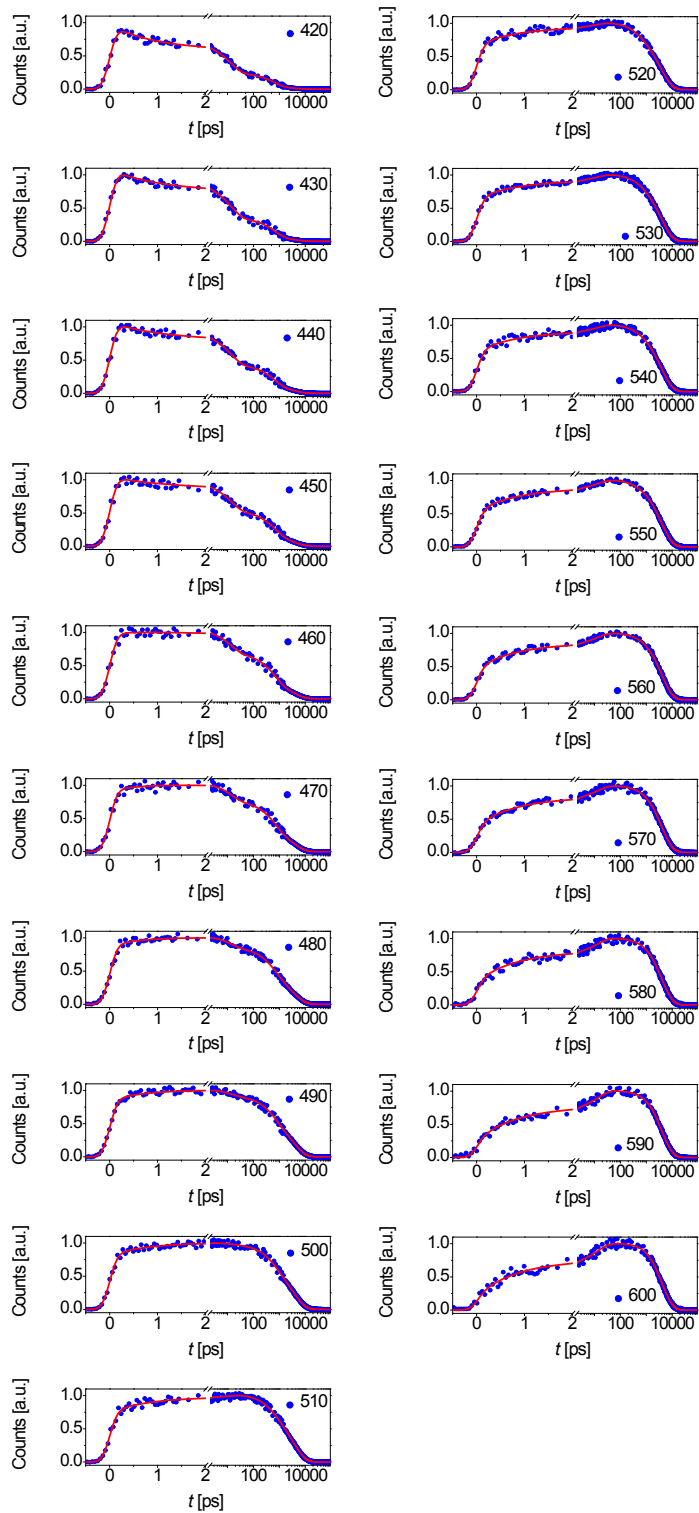

**Fig. S3.** PL traces (blue dots) of EBTBA in THF (50  $\mu\text{M}$ ) probed at a series of wavelengths. Note that PL intensities at different wavelengths

have been normalized. The red solid lines are fittings via eqn.:  $I_{\text{PL}} = I_0 + \sum_{i=1}^4 A_i \exp(-t/\tau_i) \otimes \text{IRF}$ . Excitation wavelength: 380 nm.



**Table S1.** Time constants and amplitudes employed to fit PL traces for EBTBA in THF <sup>a</sup>

| $\lambda$ [nm] | $A_1$       | $\tau_1$ [ps] | $A_2$       | $\tau_2$ [ps] | $A_3$       | $\tau_3$ [ps] | $A_4$      | $\tau_4$ [ps] | $\bar{\tau}$ [ps] |
|----------------|-------------|---------------|-------------|---------------|-------------|---------------|------------|---------------|-------------------|
| 420            | 0.32±0.020  | 0.75±0.04     | 0.43±0.022  | 13.5±1.1      | 0.21±0.014  | 632.0±29.2    | 0.03±0.002 | 3875.0±56.4   | 257.6±8.1         |
| 430            | 0.23±0.013  | 0.75±0.04     | 0.45±0.025  | 13.5±1.1      | 0.26±0.016  | 632.0±29.2    | 0.05±0.004 | 3875.0±56.4   | 384.3±15.3        |
| 440            | 0.18±0.012  | 0.75±0.04     | 0.42±0.022  | 13.5±1.1      | 0.30±0.019  | 632.0±29.2    | 0.10±0.006 | 3875.0±56.4   | 562.2±24.2        |
| 450            | 0.11±0.007  | 0.75±0.04     | 0.39±0.024  | 13.5±1.1      | 0.35±0.017  | 632.0±29.2    | 0.15±0.011 | 3875.0±56.4   | 815.9±43.6        |
| 460            | -0.06±0.003 | 0.75±0.04     | 0.34±0.027  | 13.5±1.1      | 0.45±0.020  | 632.0±29.2    | 0.21±0.014 | 3875.0±56.4   | 1111.4±55.6       |
| 470            | -0.12±0.009 | 0.75±0.04     | 0.27±0.019  | 13.5±1.1      | 0.43±0.019  | 632.0±29.2    | 0.30±0.017 | 3875.0±56.4   | 1449.0±68.9       |
| 480            | -0.15±0.011 | 0.75±0.04     | 0.18±0.012  | 13.5±1.1      | 0.40±0.021  | 632.0±29.2    | 0.42±0.020 | 3875.0±56.4   | 1872.8±78.2       |
| 490            | -0.18±0.012 | 0.75±0.04     | 0.11±0.007  | 13.5±1.1      | 0.37±0.019  | 632.0±29.2    | 0.52±0.023 | 3875.0±56.4   | 2267.1±88.5       |
| 500            | -0.21±0.017 | 0.75±0.04     | 0.03±0.001  | 13.5±1.1      | 0.34±0.021  | 632.0±29.2    | 0.63±0.027 | 3875.0±56.4   | 2663.8±107.9      |
| 510            | -0.23±0.020 | 0.75±0.04     | -0.05±0.003 | 13.5±1.1      | 0.29±0.025  | 632.0±29.2    | 0.71±0.030 | 3875.0±56.4   | 2937.3±117.5      |
| 520            | -0.27±0.019 | 0.75±0.04     | -0.10±0.005 | 13.5±1.1      | 0.18±0.011  | 632.0±29.2    | 0.82±0.032 | 3875.0±56.4   | 3281.8±123.3      |
| 530            | -0.27±0.021 | 0.75±0.04     | -0.12±0.007 | 13.5±1.1      | 0.10±0.007  | 632.0±29.2    | 0.90±0.033 | 3875.0±56.4   | 3566.0±129.5      |
| 540            | -0.29±0.022 | 0.75±0.04     | -0.13±0.005 | 13.5±1.1      | 0.06±0.003  | 632.0±29.2    | 0.94±0.027 | 3875.0±56.4   | 3672.3±108.4      |
| 550            | -0.33±0.025 | 0.75±0.04     | -0.16±0.012 | 13.5±1.1      | 0.03±0.001  | 632.0±29.2    | 0.97±0.029 | 3875.0±56.4   | 3763.7±115.2      |
| 560            | -0.34±0.021 | 0.75±0.04     | -0.19±0.014 | 13.5±1.1      | -0.03±0.002 | 632.0±29.2    | 1.00±0.032 | 3875.0±56.4   | 3875.0±125.7      |
| 570            | -0.37±0.022 | 0.75±0.04     | -0.21±0.017 | 13.5±1.1      | -0.06±0.003 | 632.0±29.2    | 1.00±0.031 | 3875.0±56.4   | 3875.0±122.6      |
| 580            | -0.39±0.018 | 0.75±0.04     | -0.23±0.015 | 13.5±1.1      | -0.07±0.004 | 632.0±29.2    | 1.00±0.035 | 3875.0±56.4   | 3875.0±140.3      |
| 590            | -0.42±0.031 | 0.75±0.04     | -0.26±0.021 | 13.5±1.1      | -0.10±0.006 | 632.0±29.2    | 1.00±0.032 | 3875.0±56.4   | 3875.0±127.3      |
| 600            | -0.44±0.032 | 0.75±0.04     | -0.27±0.022 | 13.5±1.1      | -0.12±0.010 | 632.0±29.2    | 1.00±0.037 | 3875.0±56.4   | 3875.0±152.3      |

<sup>a</sup> The average lifetime of PL at a certain wavelength was calculated according to eqn.:  $\bar{\tau} = \sum_{i=1}^4 A_i \tau_i / \sum_{i=1}^4 A_i (A_i > 0)$ .

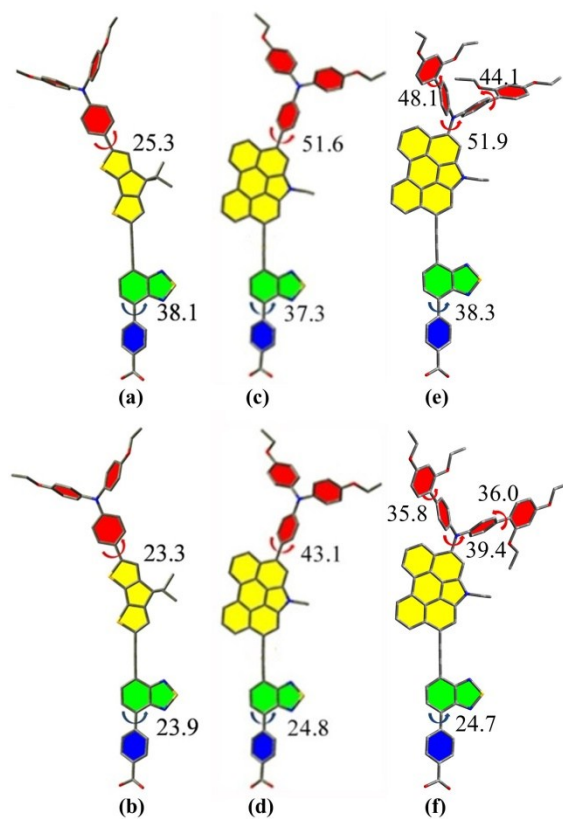

**Fig. S4.** Optimized geometries of the ground singlet states ( $S_0$ ) and first equilibrium excited singlet states ( $S_1^{\text{eq}}$ ) with THF as solvent: (a)  $S_0$  of SC-1, (b)  $S_1^{\text{eq}}$  of SC-1, (c)  $S_0$  of SC-2, (d)  $S_1^{\text{eq}}$  of SC-2, (e)  $S_0$  of SC-3, and (f)  $S_1^{\text{eq}}$  of SC-3. The large aliphatic chains were replaced with ethyl to improve the computational efficiency. Dihedral angles are included on the side of a molecular skeleton, and are evidently distinct at the  $S_1^{\text{vert}}$  and  $S_1^{\text{eq}}$  states. Aromatic rings are filled with various colors for clarity of presentation.

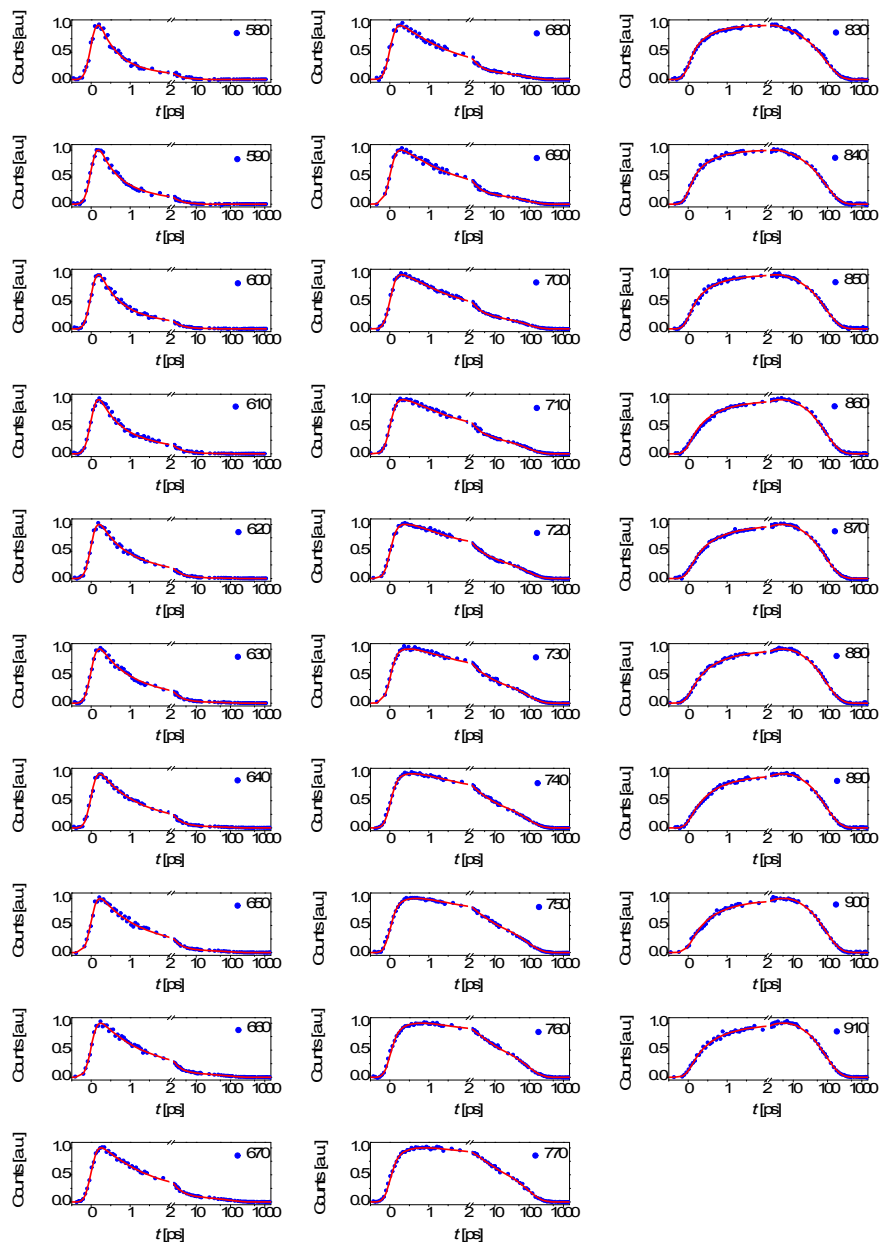

**Fig. S5.** PL traces (blue dots) of SC-1 in THF (50  $\mu\text{M}$ ) probed at a series of wavelengths. Note that PL intensities at different wavelengths

have been normalized. The red solid lines are fittings via eqn.:  $I_{\text{PL}} = I_0 + \sum_{i=1}^4 A_i \exp(-t / \tau_i) \otimes \text{IRF}$ . Excitation wavelength: 490 nm.

**Table S2.** Time constants and amplitudes employed to fit PL traces for SC-1 in THF <sup>a</sup>

| $\lambda$ [nm] | $A_1$       | $\tau_1$ [ps] | $A_2$       | $\tau_2$ [ps] | $A_3$       | $\tau_3$ [ps] | $A_4$      | $\tau_4$ [ps] | $\bar{\tau}$ [ps] |
|----------------|-------------|---------------|-------------|---------------|-------------|---------------|------------|---------------|-------------------|
| 580            | 0.71±0.035  | 0.39±0.04     | 0.25±0.019  | 1.1±0.08      | 0.04±0.002  | 5.2±0.3       | 0          | 86.6±2.2      | 0.76±0.01         |
| 590            | 0.62±0.030  | 0.39±0.04     | 0.34±0.015  | 1.1±0.08      | 0.04±0.003  | 5.2±0.3       | 0          | 86.6±2.2      | 1.0±0.02          |
| 600            | 0.58±0.032  | 0.39±0.04     | 0.38±0.030  | 1.1±0.08      | 0.04±0.003  | 5.2±0.3       | 0          | 86.6±2.2      | 1.2±0.02          |
| 610            | 0.52±0.038  | 0.39±0.04     | 0.42±0.027  | 1.1±0.08      | 0.05±0.004  | 5.2±0.3       | 0.01±0.001 | 86.6±2.2      | 1.5±0.1           |
| 620            | 0.36±0.028  | 0.39±0.04     | 0.57±0.032  | 1.1±0.08      | 0.06±0.004  | 5.2±0.3       | 0.01±0.001 | 86.6±2.2      | 2.1±0.1           |
| 630            | 0.24±0.019  | 0.39±0.04     | 0.68±0.040  | 1.1±0.08      | 0.06±0.003  | 5.2±0.3       | 0.02±0.001 | 86.6±2.2      | 2.9±0.1           |
| 640            | 0.11±0.008  | 0.39±0.04     | 0.79±0.042  | 1.1±0.08      | 0.07±0.002  | 5.2±0.3       | 0.03±0.002 | 86.6±2.2      | 3.5±0.2           |
| 650            | 0.04±0.003  | 0.39±0.04     | 0.84±0.041  | 1.1±0.08      | 0.08±0.005  | 5.2±0.3       | 0.04±0.003 | 86.6±2.2      | 4.6±0.3           |
| 660            | -0.10±0.008 | 0.39±0.04     | 0.87±0.032  | 1.1±0.08      | 0.08±0.003  | 5.2±0.3       | 0.05±0.003 | 86.6±2.2      | 6.0±0.3           |
| 670            | -0.19±0.012 | 0.39±0.04     | 0.84±0.038  | 1.1±0.08      | 0.09±0.003  | 5.2±0.3       | 0.07±0.004 | 86.6±2.2      | 7.3±0.4           |
| 680            | -0.24±0.017 | 0.39±0.04     | 0.81±0.036  | 1.1±0.08      | 0.10±0.007  | 5.2±0.3       | 0.09±0.006 | 86.6±2.2      | 9.6±0.6           |
| 690            | -0.30±0.021 | 0.39±0.04     | 0.78±0.032  | 1.1±0.08      | 0.10±0.005  | 5.2±0.3       | 0.12±0.008 | 86.6±2.2      | 11.6±0.7          |
| 700            | -0.34±0.021 | 0.39±0.04     | 0.73±0.042  | 1.1±0.08      | 0.12±0.010  | 5.2±0.3       | 0.15±0.010 | 86.6±2.2      | 14.4±0.9          |
| 710            | -0.39±0.022 | 0.39±0.04     | 0.67±0.032  | 1.1±0.08      | 0.14±0.012  | 5.2±0.3       | 0.19±0.014 | 86.6±2.2      | 18.1±1.3          |
| 720            | -0.45±0.032 | 0.39±0.04     | 0.58±0.038  | 1.1±0.08      | 0.18±0.012  | 5.2±0.3       | 0.24±0.020 | 86.6±2.2      | 22.3±1.8          |
| 730            | -0.45±0.029 | 0.39±0.04     | 0.48±0.035  | 1.1±0.08      | 0.23±0.016  | 5.2±0.3       | 0.29±0.021 | 86.6±2.2      | 26.1±2.0          |
| 740            | -0.45±0.030 | 0.39±0.04     | 0.42±0.036  | 1.1±0.08      | 0.26±0.016  | 5.2±0.3       | 0.32±0.024 | 86.6±2.2      | 29.9±2.2          |
| 750            | -0.46±0.031 | 0.39±0.04     | 0.33±0.028  | 1.1±0.08      | 0.28±0.021  | 5.2±0.3       | 0.39±0.023 | 86.6±2.2      | 35.7±2.2          |
| 760            | -0.47±0.027 | 0.39±0.04     | 0.23±0.019  | 1.1±0.08      | 0.32±0.020  | 5.2±0.3       | 0.45±0.030 | 86.6±2.2      | 40.7±2.8          |
| 770            | -0.47±0.025 | 0.39±0.04     | 0.15±0.012  | 1.1±0.08      | 0.32±0.024  | 5.2±0.3       | 0.53±0.032 | 86.6±2.2      | 47.4±3.0          |
| 830            | -0.47±0.029 | 0.39±0.04     | -0.22±0.017 | 1.1±0.08      | 0.12±0.010  | 5.2±0.3       | 0.88±0.038 | 86.6±2.2      | 76.5±3.4          |
| 840            | -0.48±0.031 | 0.39±0.04     | -0.24±0.021 | 1.1±0.08      | 0.07±0.005  | 5.2±0.3       | 0.93±0.043 | 86.6±2.2      | 81.1±3.8          |
| 850            | -0.50±0.034 | 0.39±0.04     | -0.28±0.020 | 1.1±0.08      | 0.03±0.002  | 5.2±0.3       | 0.97±0.046 | 86.6±2.2      | 84.2±4.1          |
| 860            | -0.50±0.032 | 0.39±0.04     | -0.32±0.021 | 1.1±0.08      | -0.07±0.003 | 5.2±0.3       | 1.00±0.041 | 86.6±2.2      | 86.6±3.7          |
| 870            | -0.51±0.034 | 0.39±0.04     | -0.34±0.022 | 1.1±0.08      | -0.08±0.005 | 5.2±0.3       | 1.00±0.045 | 86.6±2.2      | 86.6±4.0          |
| 880            | -0.51±0.039 | 0.39±0.04     | -0.35±0.019 | 1.1±0.08      | -0.10±0.007 | 5.2±0.3       | 1.00±0.039 | 86.6±2.2      | 86.6±3.5          |
| 890            | -0.51±0.028 | 0.39±0.04     | -0.35±0.021 | 1.1±0.08      | -0.10±0.008 | 5.2±0.3       | 1.00±0.046 | 86.6±2.2      | 86.6±4.1          |
| 900            | -0.51±0.026 | 0.39±0.04     | -0.35±0.023 | 1.1±0.08      | -0.10±0.006 | 5.2±0.3       | 1.00±0.043 | 86.6±2.2      | 86.6±3.9          |
| 910            | -0.51±0.027 | 0.39±0.04     | -0.35±0.027 | 1.1±0.08      | -0.10±0.006 | 5.2±0.3       | 1.00±0.040 | 86.6±2.2      | 86.6±3.6          |

<sup>a</sup> The average lifetime of PL at a certain wavelength was calculated according to eqn.:  $\bar{\tau} = \sum_{i=1}^4 A_i \tau_i / \sum_{i=1}^4 A_i (A_i > 0)$ .

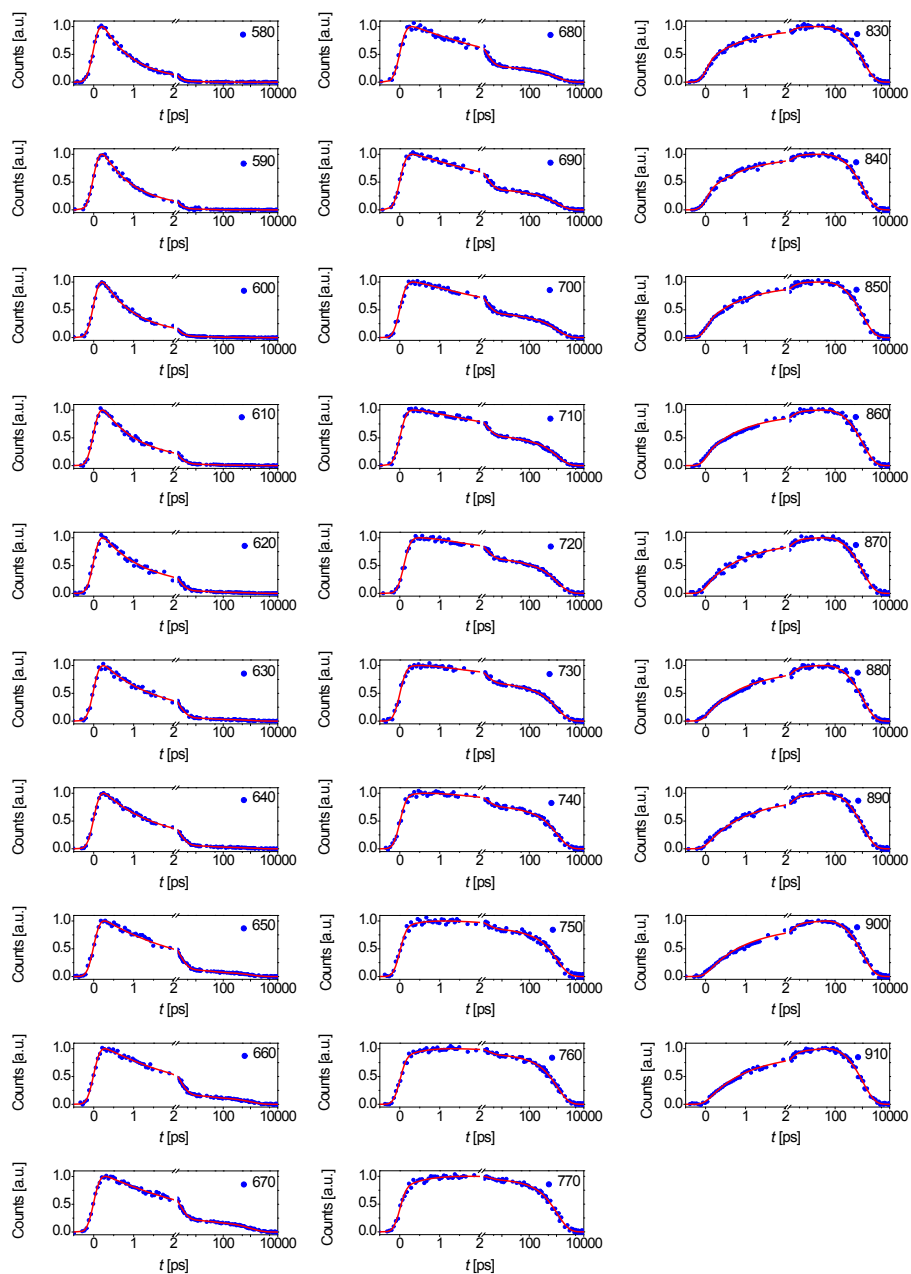

**Fig. S6.** PL traces (blue dots) of SC-2 in THF (50  $\mu\text{M}$ ) probed at a series of wavelengths. Note that PL intensities at different wavelengths

have been normalized. The red solid lines are fittings via eqn.:  $I_{\text{PL}} = I_0 + \sum_{i=1}^4 A_i \exp(-t / \tau_i) \otimes \text{IRF}$ . Excitation wavelength: 490 nm.

**Table S3.** Time constants and amplitudes employed to fit PL traces for SC-2 in THF <sup>a</sup>

| $\lambda$ [nm] | $A_1$       | $\tau_1$ [ps] | $A_2$       | $\tau_2$ [ps] | $A_3$       | $\tau_3$ [ps] | $A_4$      | $\tau_4$ [ps] | $\bar{\tau}$ [ps] |
|----------------|-------------|---------------|-------------|---------------|-------------|---------------|------------|---------------|-------------------|
| 580            | 0.90±0.045  | 0.74±0.04     | 0.09±0.004  | 1.8±0.2       | 0.01±0.001  | 35.8±1.1      | 0          | 1049.0±19.7   | 1.5±0.04          |
| 590            | 0.84±0.043  | 0.74±0.04     | 0.15±0.012  | 1.8±0.2       | 0.01±0.001  | 35.8±1.1      | 0          | 1049.0±19.7   | 3.0±0.04          |
| 600            | 0.82±0.040  | 0.74±0.04     | 0.17±0.017  | 1.8±0.2       | 0.01±0.001  | 35.8±1.1      | 0          | 1049.0±19.7   | 5.9±0.04          |
| 610            | 0.65±0.038  | 0.74±0.04     | 0.32±0.015  | 1.8±0.2       | 0.02±0.001  | 35.8±1.1      | 0.01±0.001 | 1049.0±19.7   | 9.9±1.1           |
| 620            | 0.49±0.037  | 0.74±0.04     | 0.47±0.021  | 1.8±0.2       | 0.02±0.001  | 35.8±1.1      | 0.02±0.001 | 1049.0±19.7   | 18.4±1.1          |
| 630            | 0.24±0.021  | 0.74±0.04     | 0.70±0.023  | 1.8±0.2       | 0.03±0.002  | 35.8±1.1      | 0.03±0.002 | 1049.0±19.7   | 28.7±2.2          |
| 640            | 0.10±0.007  | 0.74±0.04     | 0.83±0.035  | 1.8±0.2       | 0.03±0.001  | 35.8±1.1      | 0.04±0.003 | 1049.0±19.7   | 45.3±3.2          |
| 650            | -0.11±0.005 | 0.74±0.04     | 0.90±0.043  | 1.8±0.2       | 0.04±0.003  | 35.8±1.1      | 0.06±0.004 | 1049.0±19.7   | 67.5±4.3          |
| 660            | -0.18±0.012 | 0.74±0.04     | 0.87±0.034  | 1.8±0.2       | 0.04±0.002  | 35.8±1.1      | 0.09±0.005 | 1049.0±19.7   | 94.6±5.3          |
| 670            | -0.21±0.015 | 0.74±0.04     | 0.83±0.044  | 1.8±0.2       | 0.04±0.002  | 35.8±1.1      | 0.13±0.007 | 1049.0±19.7   | 135.5±7.4         |
| 680            | -0.24±0.020 | 0.74±0.04     | 0.79±0.032  | 1.8±0.2       | 0.04±0.004  | 35.8±1.1      | 0.17±0.012 | 1049.0±19.7   | 181.0±12.7        |
| 690            | -0.25±0.018 | 0.74±0.04     | 0.73±0.039  | 1.8±0.2       | 0.04±0.003  | 35.8±1.1      | 0.23±0.016 | 1049.0±19.7   | 240.7±16.9        |
| 700            | -0.27±0.016 | 0.74±0.04     | 0.69±0.043  | 1.8±0.2       | 0.04±0.002  | 35.8±1.1      | 0.27±0.020 | 1049.0±19.7   | 285.9±21.1        |
| 710            | -0.28±0.019 | 0.74±0.04     | 0.61±0.032  | 1.8±0.2       | 0.05±0.003  | 35.8±1.1      | 0.34±0.026 | 1049.0±19.7   | 358.3±27.4        |
| 720            | -0.29±0.021 | 0.74±0.04     | 0.55±0.037  | 1.8±0.2       | 0.05±0.004  | 35.8±1.1      | 0.40±0.028 | 1049.0±19.7   | 424.3±29.5        |
| 730            | -0.31±0.020 | 0.74±0.04     | 0.50±0.038  | 1.8±0.2       | 0.05±0.002  | 35.8±1.1      | 0.45±0.030 | 1049.0±19.7   | 474.4±31.5        |
| 740            | -0.32±0.025 | 0.74±0.04     | 0.43±0.032  | 1.8±0.2       | 0.04±0.002  | 35.8±1.1      | 0.53±0.032 | 1049.0±19.7   | 554.9±33.6        |
| 750            | -0.34±0.020 | 0.74±0.04     | 0.34±0.027  | 1.8±0.2       | 0.04±0.003  | 35.8±1.1      | 0.62±0.035 | 1049.0±19.7   | 657.3±36.8        |
| 760            | -0.36±0.021 | 0.74±0.04     | 0.29±0.024  | 1.8±0.2       | 0.04±0.002  | 35.8±1.1      | 0.67±0.037 | 1049.0±19.7   | 703.5±38.9        |
| 770            | -0.37±0.024 | 0.74±0.04     | 0.22±0.016  | 1.8±0.2       | 0.03±0.001  | 35.8±1.1      | 0.75±0.040 | 1049.0±19.7   | 789.8±42.0        |
| 830            | -0.42±0.030 | 0.74±0.04     | -0.21±0.015 | 1.8±0.2       | -0.06±0.004 | 35.8±1.1      | 1.00±0.045 | 1049.0±19.7   | 1049.0±47.4       |
| 840            | -0.42±0.031 | 0.74±0.04     | -0.25±0.014 | 1.8±0.2       | -0.07±0.005 | 35.8±1.1      | 1.00±0.043 | 1049.0±19.7   | 1049.0±45.3       |
| 850            | -0.43±0.027 | 0.74±0.04     | -0.27±0.020 | 1.8±0.2       | -0.07±0.004 | 35.8±1.1      | 1.00±0.042 | 1049.0±19.7   | 1049.0±44.2       |
| 860            | -0.44±0.029 | 0.74±0.04     | -0.30±0.021 | 1.8±0.2       | -0.09±0.005 | 35.8±1.1      | 1.00±0.040 | 1049.0±19.7   | 1049.0±42.1       |
| 870            | -0.45±0.034 | 0.74±0.04     | -0.34±0.024 | 1.8±0.2       | -0.09±0.007 | 35.8±1.1      | 1.00±0.039 | 1049.0±19.7   | 1049.0±41.2       |
| 880            | -0.46±0.036 | 0.74±0.04     | -0.37±0.032 | 1.8±0.2       | -0.10±0.008 | 35.8±1.1      | 1.00±0.038 | 1049.0±19.7   | 1049.0±40.2       |
| 890            | -0.46±0.032 | 0.74±0.04     | -0.40±0.032 | 1.8±0.2       | -0.11±0.006 | 35.8±1.1      | 1.00±0.037 | 1049.0±19.7   | 1049.0±39.0       |
| 900            | -0.46±0.031 | 0.74±0.04     | -0.41±0.024 | 1.8±0.2       | -0.12±0.010 | 35.8±1.1      | 1.00±0.040 | 1049.0±19.7   | 1049.0±42.3       |
| 910            | -0.46±0.033 | 0.74±0.04     | -0.41±0.028 | 1.8±0.2       | -0.12±0.009 | 35.8±1.1      | 1.00±0.038 | 1049.0±19.7   | 1049.0±40.2       |

<sup>a</sup> The average lifetime of PL at a certain wavelength was calculated according to eqn.:  $\bar{\tau} = \frac{\sum_{i=1}^4 A_i \tau_i}{\sum_{i=1}^4 A_i (A_i > 0)}$ .

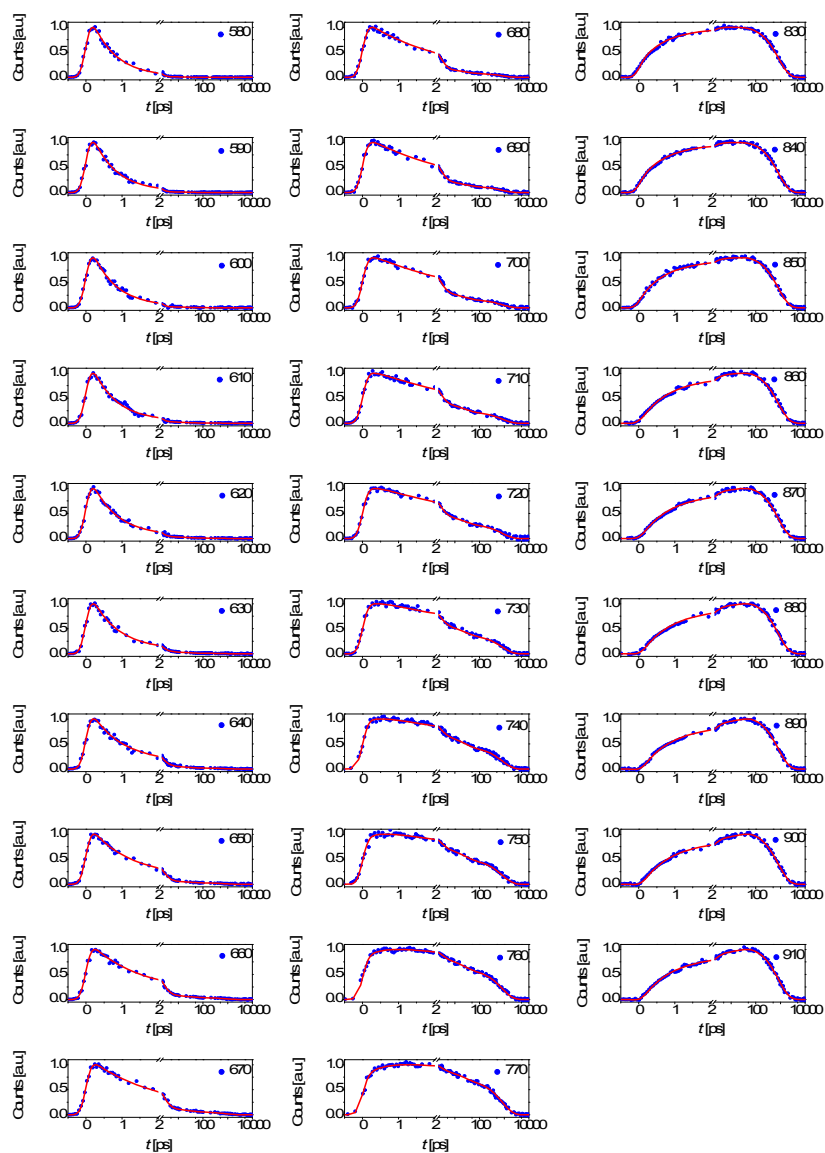

**Fig. S7.** PL traces (blue dots) of SC-3 in THF (50  $\mu\text{M}$ ) probed at a series of wavelengths. Note that PL intensities at different wavelengths

have been normalized. The red solid lines are fittings via eqn.:  $I_{\text{PL}} = I_0 + \sum_{i=1}^4 A_i \exp(-t/\tau_i) \otimes \text{IRF}$ . Excitation wavelength: 490 nm.

**Table S4.** Time constants and amplitudes employed to fit PL traces for SC-3 in THF <sup>a</sup>

| $\lambda$ | $A_1$       | $\tau_1$ [ps] | $A_2$       | $\tau_2$ [ps] | $A_3$       | $\tau_3$ [ps] | $A_4$      | $\tau_4$ [ps] | $\bar{\tau}$ [ps] |
|-----------|-------------|---------------|-------------|---------------|-------------|---------------|------------|---------------|-------------------|
| 580       | 0.96±0.047  | 0.64±0.04     | 0.03±0.002  | 1.7±0.1       | 0.01±0.001  | 23.5±1.1      | 0          | 834.2±9.7     | 1.1±0.02          |
| 590       | 0.96±0.042  | 0.64±0.04     | 0.03±0.002  | 1.7±0.1       | 0.01±0.001  | 23.5±1.1      | 0          | 834.2±9.7     | 2.1±0.03          |
| 600       | 0.95±0.044  | 0.64±0.04     | 0.04±0.003  | 1.7±0.1       | 0.01±0.001  | 23.5±1.1      | 0          | 834.2±9.7     | 3.2±0.02          |
| 610       | 0.93±0.042  | 0.64±0.04     | 0.05±0.004  | 1.7±0.1       | 0.02±0.001  | 23.5±1.1      | 0          | 834.2±9.7     | 5.2±0.03          |
| 620       | 0.88±0.048  | 0.64±0.04     | 0.09±0.006  | 1.7±0.1       | 0.02±0.001  | 23.5±1.1      | 0.01±0.001 | 834.2±9.7     | 7.3±0.9           |
| 630       | 0.79±0.040  | 0.64±0.04     | 0.18±0.012  | 1.7±0.1       | 0.02±0.001  | 23.5±1.1      | 0.01±0.001 | 834.2±9.7     | 8.5±0.8           |
| 640       | 0.57±0.38   | 0.64±0.04     | 0.38±0.023  | 1.7±0.1       | 0.03±0.002  | 23.5±1.1      | 0.02±0.001 | 834.2±9.7     | 15.5±0.9          |
| 650       | 0.35±0.021  | 0.64±0.04     | 0.60±0.032  | 1.7±0.1       | 0.03±0.001  | 23.5±1.1      | 0.02±0.001 | 834.2±9.7     | 22.7±1.0          |
| 660       | 0.13±0.011  | 0.64±0.04     | 0.79±0.033  | 1.7±0.1       | 0.04±0.002  | 23.5±1.1      | 0.04±0.003 | 834.2±9.7     | 32.6±2.6          |
| 670       | -0.06±0.003 | 0.64±0.04     | 0.88±0.035  | 1.7±0.1       | 0.06±0.003  | 23.5±1.1      | 0.06±0.003 | 834.2±9.7     | 45.4±2.8          |
| 680       | -0.11±0.005 | 0.64±0.04     | 0.86±0.037  | 1.7±0.1       | 0.07±0.005  | 23.5±1.1      | 0.07±0.005 | 834.2±9.7     | 58.2±4.3          |
| 690       | -0.19±0.012 | 0.64±0.04     | 0.83±0.038  | 1.7±0.1       | 0.08±0.004  | 23.5±1.1      | 0.09±0.004 | 834.2±9.7     | 81.5±3.5          |
| 700       | -0.25±0.017 | 0.64±0.04     | 0.77±0.039  | 1.7±0.1       | 0.11±0.006  | 23.5±1.1      | 0.12±0.010 | 834.2±9.7     | 103.6±8.6         |
| 710       | -0.27±0.021 | 0.64±0.04     | 0.71±0.032  | 1.7±0.1       | 0.13±0.008  | 23.5±1.1      | 0.16±0.012 | 834.2±9.7     | 140.7±10.3        |
| 720       | -0.30±0.023 | 0.64±0.04     | 0.67±0.043  | 1.7±0.1       | 0.13±0.012  | 23.5±1.1      | 0.20±0.014 | 834.2±9.7     | 172.7±12.1        |
| 730       | -0.32±0.025 | 0.64±0.04     | 0.59±0.032  | 1.7±0.1       | 0.15±0.012  | 23.5±1.1      | 0.26±0.016 | 834.2±9.7     | 225.0±13.8        |
| 740       | -0.33±0.021 | 0.64±0.04     | 0.50±0.033  | 1.7±0.1       | 0.18±0.015  | 23.5±1.1      | 0.32±0.021 | 834.2±9.7     | 269.0±18.1        |
| 750       | -0.36±0.022 | 0.64±0.04     | 0.46±0.029  | 1.7±0.1       | 0.18±0.014  | 23.5±1.1      | 0.36±0.024 | 834.2±9.7     | 302.6±20.6        |
| 760       | -0.41±0.030 | 0.64±0.04     | 0.38±0.027  | 1.7±0.1       | 0.18±0.014  | 23.5±1.1      | 0.44±0.030 | 834.2±9.7     | 371.2±25.7        |
| 770       | -0.44±0.031 | 0.64±0.04     | 0.31±0.025  | 1.7±0.1       | 0.16±0.012  | 23.5±1.1      | 0.53±0.033 | 834.2±9.7     | 443.6±28.1        |
| 830       | -0.62±0.032 | 0.64±0.04     | -0.12±0.010 | 1.7±0.1       | -0.04±0.002 | 23.5±1.1      | 1.00±0.035 | 834.2±9.7     | 834.2±29.6        |
| 840       | -0.62±0.035 | 0.64±0.04     | -0.14±0.012 | 1.7±0.1       | -0.06±0.005 | 23.5±1.1      | 1.00±0.042 | 834.2±9.7     | 834.2±35.7        |
| 850       | -0.63±0.032 | 0.64±0.04     | -0.18±0.013 | 1.7±0.1       | -0.08±0.003 | 23.5±1.1      | 1.00±0.043 | 834.2±9.7     | 834.2±36.4        |
| 860       | -0.63±0.037 | 0.64±0.04     | -0.30±0.019 | 1.7±0.1       | -0.10±0.007 | 23.5±1.1      | 1.00±0.045 | 834.2±9.7     | 834.2±38.1        |
| 870       | -0.63±0.038 | 0.64±0.04     | -0.31±0.021 | 1.7±0.1       | -0.12±0.010 | 23.5±1.1      | 1.00±0.044 | 834.2±9.7     | 834.2±37.4        |
| 880       | -0.63±0.029 | 0.64±0.04     | -0.32±0.023 | 1.7±0.1       | -0.14±0.011 | 23.5±1.1      | 1.00±0.042 | 834.2±9.7     | 834.2±35.7        |
| 890       | -0.63±0.031 | 0.64±0.04     | -0.32±0.024 | 1.7±0.1       | -0.16±0.012 | 23.5±1.1      | 1.00±0.040 | 834.2±9.7     | 834.2±34.1        |
| 900       | -0.63±0.033 | 0.64±0.04     | -0.32±0.021 | 1.7±0.1       | -0.16±0.012 | 23.5±1.1      | 1.00±0.039 | 834.2±9.7     | 834.2±33.1        |
| 910       | -0.63±0.035 | 0.64±0.04     | -0.32±0.020 | 1.7±0.1       | -0.16±0.011 | 23.5±1.1      | 1.00±0.037 | 834.2±9.7     | 834.2±31.5        |

<sup>a</sup> The average lifetime of PL at a certain wavelength was calculated according to eqn.:  $\bar{\tau} = \sum_{i=1}^4 A_i \tau_i / \sum_{i=1}^4 A_i (A_i > 0)$ .



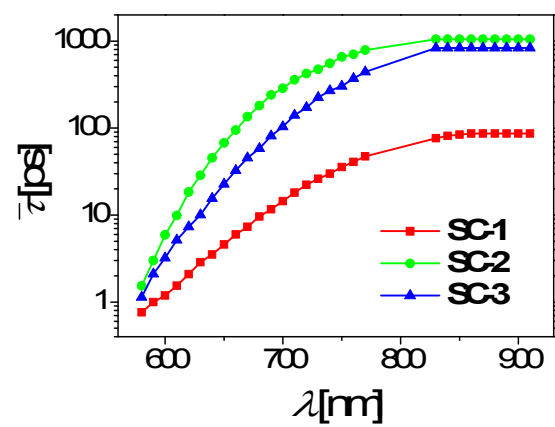

**Fig. S8.** Wavelength-dependent average time constants ( $\bar{\tau}$ ) of SC-1, SC-2, and SC-3 in THF.

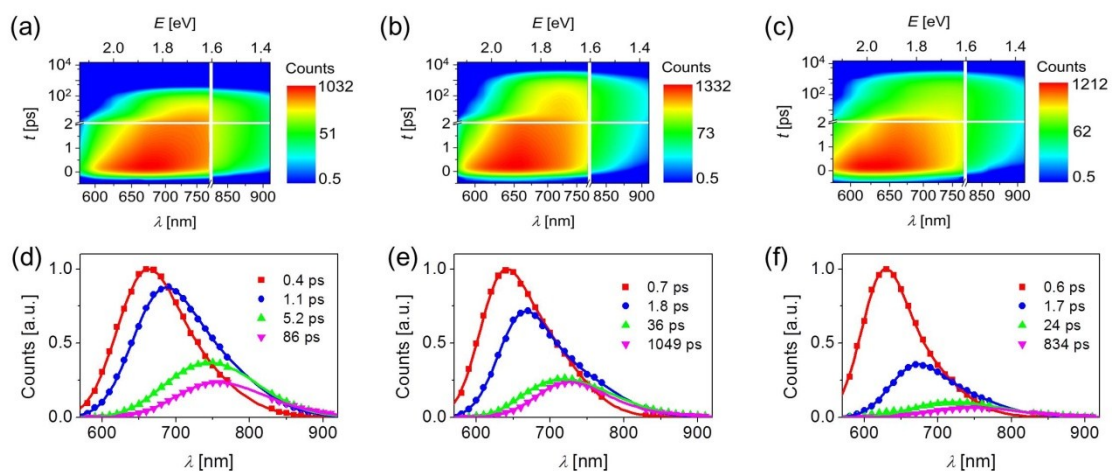

**Fig. S9.** (a–c) Contour plots of time-resolved PL (TRPL) spectra of (a) SC-1 in THF, (b) SC-2 in THF, and (c) SC-3 in THF, which were reconstructed based on the corresponding fitting curves in Fig. S5-S7 and static PL spectroscopies in Fig. 2c. (d-f) Evolution associated PL (EAPL) spectra of (d) SC-1 in THF, (e) SC-2 in THF, and (f) SC-3 in THF. The solid lines are fitting lines with a lognormal function.

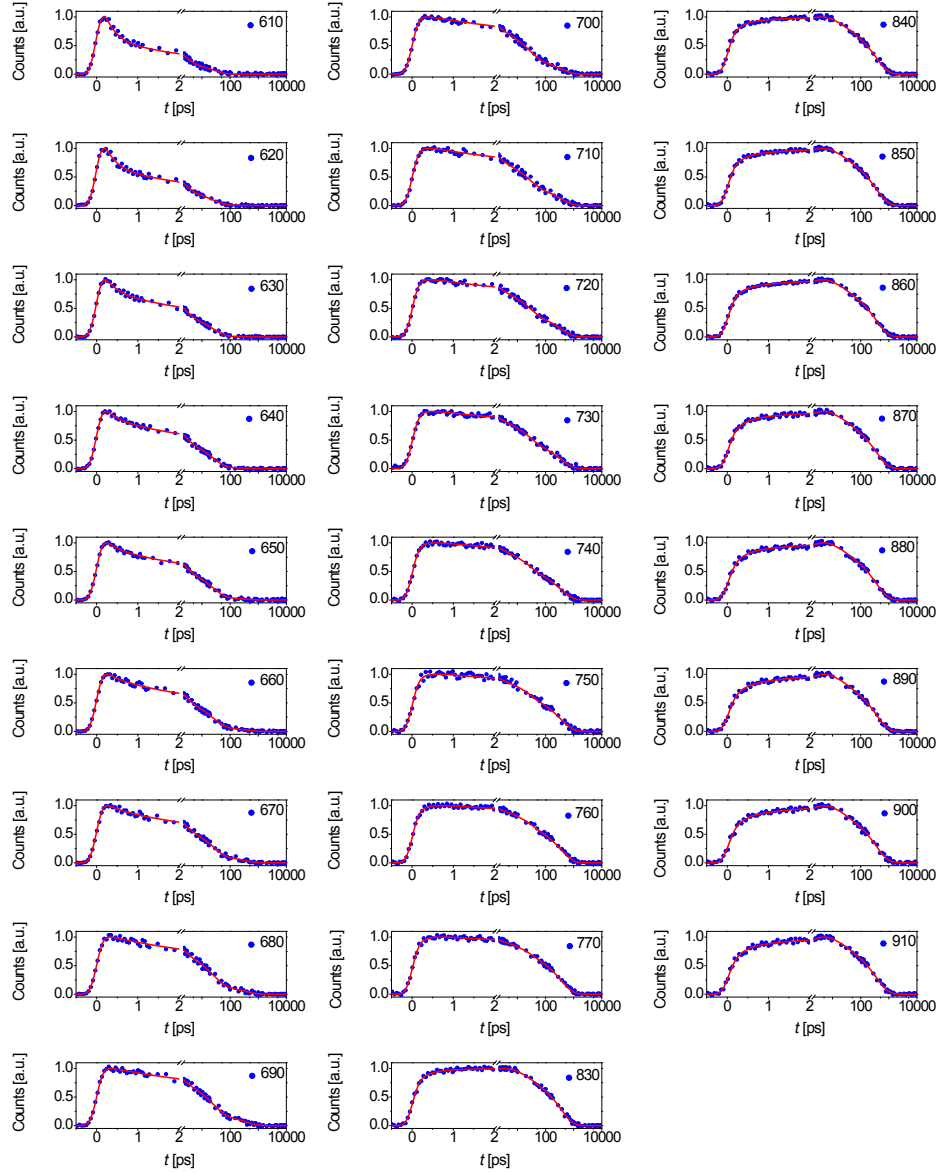

**Fig. S10.** PL traces (blue dots) of a SC-1 grafted alumina film in contact with an electrolyte probed at a series of wavelengths. Note that PL

intensities at different wavelengths have been normalized. The red solid lines are fittings via eqn.:  $I_{PL} = I_0 + \sum_{i=1}^4 A_i \exp(-t/\tau_i) \otimes \text{IRF}$ .

Excitation wavelength: 490 nm.

**Table S5.** Time constants and amplitudes employed to fit PL traces for a SC-1 grafted alumina film in contact with an electrolyte <sup>a</sup>

| $\lambda$ [nm] | $A_1$       | $\tau_1$ [ps] | $A_2$       | $\tau_2$ [ps] | $A_3$      | $\tau_3$ [ps] | $A_4$      | $\tau_4$ [ps] | $\bar{\tau}$ [ps] |
|----------------|-------------|---------------|-------------|---------------|------------|---------------|------------|---------------|-------------------|
| 610            | 0.64±0.033  | 0.23±0.02     | 0.26±0.021  | 1.0±0.06      | 0.10±0.005 | 25.3±1.0      | 0          | 351.4±6.4     | 3.2±0.1           |
| 620            | 0.58±0.037  | 0.23±0.02     | 0.28±0.024  | 1.0±0.06      | 0.14±0.011 | 25.3±1.0      | 0          | 351.4±6.4     | 5.4±0.3           |
| 630            | 0.43±0.032  | 0.23±0.02     | 0.33±0.020  | 1.0±0.06      | 0.23±0.016 | 25.3±1.0      | 0.01±0.001 | 351.4±6.4     | 8.6±0.8           |
| 640            | 0.31±0.019  | 0.23±0.02     | 0.36±0.021  | 1.0±0.06      | 0.32±0.020 | 25.3±1.0      | 0.01±0.001 | 351.4±6.4     | 14.1±0.9          |
| 650            | 0.24±0.020  | 0.23±0.02     | 0.37±0.019  | 1.0±0.06      | 0.36±0.022 | 25.3±1.0      | 0.03±0.002 | 351.4±6.4     | 21.1±1.3          |
| 660            | 0.16±0.013  | 0.23±0.02     | 0.41±0.026  | 1.0±0.06      | 0.37±0.025 | 25.3±1.0      | 0.06±0.004 | 351.4±6.4     | 30.1±2.1          |
| 670            | 0.12±0.010  | 0.23±0.02     | 0.38±0.031  | 1.0±0.06      | 0.41±0.026 | 25.3±1.0      | 0.09±0.005 | 351.4±6.4     | 43.0±2.5          |
| 680            | -0.09±0.007 | 0.23±0.02     | 0.36±0.027  | 1.0±0.06      | 0.51±0.033 | 25.3±1.0      | 0.13±0.011 | 351.4±6.4     | 58.4±4.8          |
| 690            | -0.11±0.008 | 0.23±0.02     | 0.32±0.022  | 1.0±0.06      | 0.51±0.036 | 25.3±1.0      | 0.17±0.012 | 351.4±6.4     | 72.9±5.2          |
| 700            | -0.15±0.011 | 0.23±0.02     | 0.30±0.031  | 1.0±0.06      | 0.47±0.032 | 25.3±1.0      | 0.23±0.017 | 351.4±6.4     | 94.8±6.9          |
| 710            | -0.19±0.012 | 0.23±0.02     | 0.29±0.024  | 1.0±0.06      | 0.41±0.030 | 25.3±1.0      | 0.30±0.021 | 351.4±6.4     | 113.7±8.3         |
| 720            | -0.21±0.015 | 0.23±0.02     | 0.26±0.022  | 1.0±0.06      | 0.39±0.028 | 25.3±1.0      | 0.35±0.024 | 351.4±6.4     | 134.7±9.3         |
| 730            | -0.26±0.021 | 0.23±0.02     | 0.23±0.021  | 1.0±0.06      | 0.36±0.021 | 25.3±1.0      | 0.41±0.027 | 351.4±6.4     | 154.1±10.2        |
| 740            | -0.29±0.023 | 0.23±0.02     | 0.19±0.015  | 1.0±0.06      | 0.34±0.020 | 25.3±1.0      | 0.47±0.030 | 351.4±6.4     | 173.6±11.3        |
| 750            | -0.31±0.026 | 0.23±0.02     | 0.16±0.012  | 1.0±0.06      | 0.30±0.025 | 25.3±1.0      | 0.54±0.031 | 351.4±6.4     | 198.2±11.7        |
| 760            | -0.34±0.030 | 0.23±0.02     | 0.14±0.011  | 1.0±0.06      | 0.27±0.016 | 25.3±1.0      | 0.59±0.037 | 351.4±6.4     | 215.9±13.7        |
| 770            | -0.34±0.027 | 0.23±0.02     | 0.13±0.009  | 1.0±0.06      | 0.24±0.014 | 25.3±1.0      | 0.63±0.038 | 351.4±6.4     | 229.5±14.0        |
| 830            | -0.39±0.025 | 0.23±0.02     | -0.11±0.007 | 1.0±0.06      | 0.25±0.017 | 25.3±1.0      | 0.75±0.030 | 351.4±6.4     | 270.4±11.2        |
| 840            | -0.40±0.027 | 0.23±0.02     | -0.16±0.012 | 1.0±0.06      | 0.25±0.016 | 25.3±1.0      | 0.75±0.040 | 351.4±6.4     | 270.4±14.7        |
| 850            | -0.42±0.030 | 0.23±0.02     | -0.20±0.015 | 1.0±0.06      | 0.25±0.015 | 25.3±1.0      | 0.75±0.041 | 351.4±6.4     | 270.4±15.1        |
| 860            | -0.43±0.032 | 0.23±0.02     | -0.21±0.017 | 1.0±0.06      | 0.25±0.012 | 25.3±1.0      | 0.75±0.043 | 351.4±6.4     | 270.4±15.7        |
| 870            | -0.47±0.033 | 0.23±0.02     | -0.23±0.015 | 1.0±0.06      | 0.25±0.014 | 25.3±1.0      | 0.75±0.045 | 351.4±6.4     | 270.4±16.5        |
| 880            | -0.49±0.035 | 0.23±0.02     | -0.25±0.020 | 1.0±0.06      | 0.25±0.020 | 25.3±1.0      | 0.75±0.032 | 351.4±6.4     | 270.4±12.0        |
| 890            | -0.49±0.029 | 0.23±0.02     | -0.28±0.021 | 1.0±0.06      | 0.25±0.021 | 25.3±1.0      | 0.75±0.038 | 351.4±6.4     | 270.4±14.2        |
| 900            | -0.49±0.037 | 0.23±0.02     | -0.28±0.023 | 1.0±0.06      | 0.25±0.020 | 25.3±1.0      | 0.75±0.041 | 351.4±6.4     | 270.4±15.2        |
| 910            | -0.49±0.032 | 0.23±0.02     | -0.28±0.017 | 1.0±0.06      | 0.25±0.017 | 25.3±1.0      | 0.75±0.042 | 351.4±6.4     | 270.4±15.5        |

<sup>a</sup> The average lifetime of PL at a certain wavelength was calculated according to eqn.:  $\bar{\tau} = \frac{\sum_{i=1}^4 A_i \tau_i}{\sum_{i=1}^4 A_i (A_i > 0)}$ .

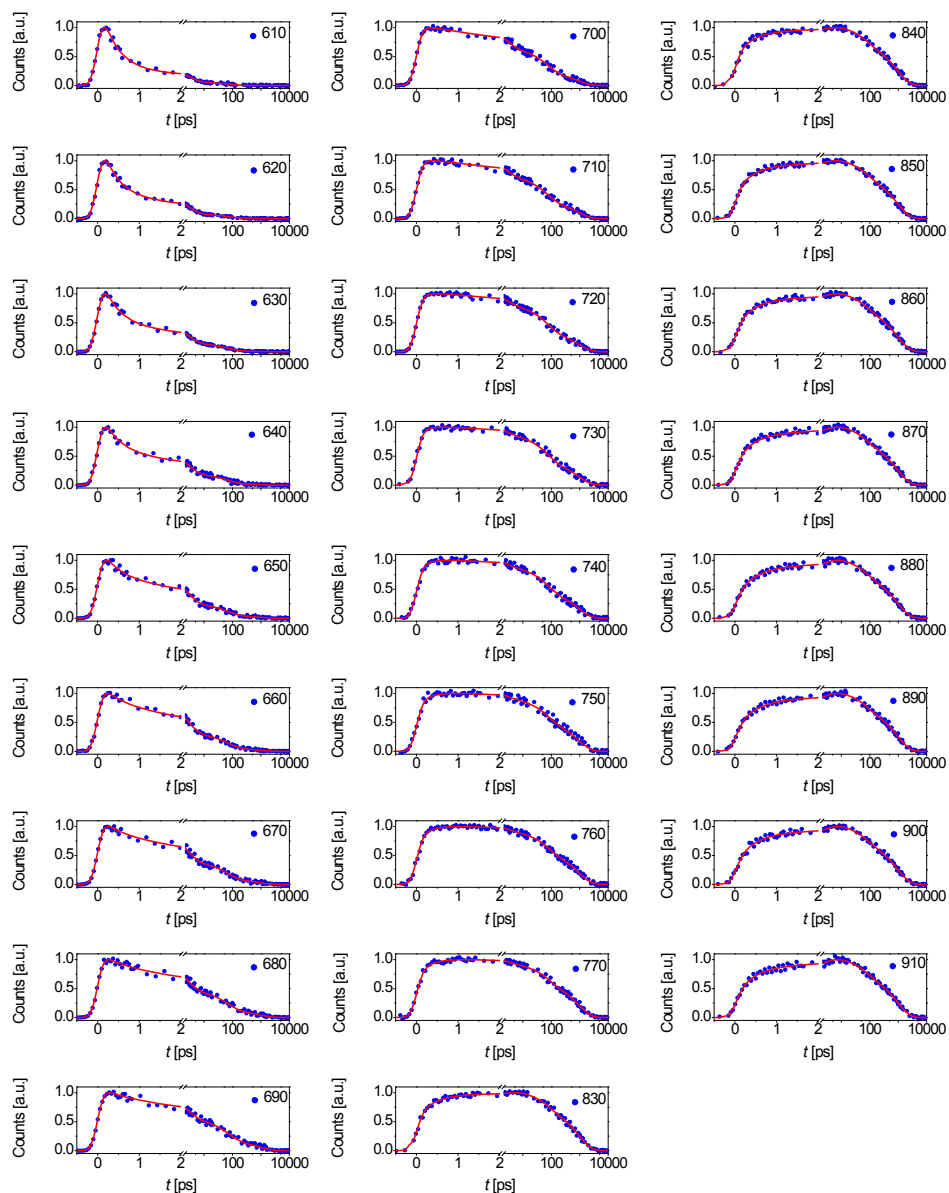

**Fig. S11.** PL traces (blue dots) of a SC-2 grafted alumina film in contact with an electrolyte probed at a series of wavelengths. Note that PL

intensities at different wavelengths have been normalized. The red solid lines are fittings via eqn.:  $I_{\text{PL}} = I_0 + \sum_{i=1}^4 A_i \exp(-t/\tau_i) \otimes \text{IRF}$ .

Excitation wavelength: 490 nm.

**Table S5.** Time constants and amplitudes employed to fit PL traces for a SC-2 grafted alumina film in contact with an electrolyte <sup>a</sup>

| $\lambda$ [nm] | $A_1$       | $\tau_1$ [ps] | $A_2$       | $\tau_2$ [ps] | $A_3$      | $\tau_3$ [ps] | $A_4$      | $\tau_4$ [ps] | $\bar{\tau}$ [ps] |
|----------------|-------------|---------------|-------------|---------------|------------|---------------|------------|---------------|-------------------|
| 610            | 0.79±0.038  | 0.35±0.03     | 0.17±0.013  | 2.5±0.3       | 0.04±0.003 | 71.2±2.4      | 0          | 945±11.6      | 4.4±0.2           |
| 620            | 0.72±0.036  | 0.35±0.03     | 0.24±0.021  | 2.5±0.3       | 0.04±0.002 | 71.2±2.4      | 0          | 945±11.6      | 8.2±0.1           |
| 630            | 0.64±0.032  | 0.35±0.03     | 0.27±0.018  | 2.5±0.3       | 0.08±0.006 | 71.2±2.4      | 0.01±0.001 | 945±11.6      | 13.4±1.4          |
| 640            | 0.56±0.028  | 0.35±0.03     | 0.32±0.020  | 2.5±0.3       | 0.11±0.007 | 71.2±2.4      | 0.01±0.001 | 945±11.6      | 23.3±1.5          |
| 650            | 0.40±0.030  | 0.35±0.03     | 0.42±0.021  | 2.5±0.3       | 0.15±0.011 | 71.2±2.4      | 0.03±0.001 | 945±11.6      | 41.0±1.8          |
| 660            | 0.22±0.016  | 0.35±0.03     | 0.53±0.023  | 2.5±0.3       | 0.21±0.018 | 71.2±2.4      | 0.04±0.002 | 945±11.6      | 54.8±3.2          |
| 670            | 0.16±0.014  | 0.35±0.03     | 0.51±0.039  | 2.5±0.3       | 0.26±0.017 | 71.2±2.4      | 0.07±0.004 | 945±11.6      | 83.1±5.1          |
| 680            | 0.12±0.010  | 0.35±0.03     | 0.48±0.036  | 2.5±0.3       | 0.30±0.021 | 71.2±2.4      | 0.10±0.007 | 945±11.6      | 119.1±8.2         |
| 690            | 0.06±0.004  | 0.35±0.03     | 0.44±0.32   | 2.5±0.3       | 0.35±0.023 | 71.2±2.4      | 0.15±0.012 | 945±11.6      | 167.7±13.2        |
| 700            | -0.06±0.005 | 0.35±0.03     | 0.40±0.027  | 2.5±0.3       | 0.40±0.027 | 71.2±2.4      | 0.20±0.017 | 945±11.6      | 219.6±18.2        |
| 710            | -0.10±0.003 | 0.35±0.03     | 0.33±0.019  | 2.5±0.3       | 0.41±0.026 | 71.2±2.4      | 0.26±0.018 | 945±11.6      | 275.9±19.1        |
| 720            | -0.14±0.012 | 0.35±0.03     | 0.25±0.012  | 2.5±0.3       | 0.44±0.029 | 71.2±2.4      | 0.31±0.021 | 945±11.6      | 324.8±22.2        |
| 730            | -0.17±0.012 | 0.35±0.03     | 0.19±0.012  | 2.5±0.3       | 0.44±0.030 | 71.2±2.4      | 0.37±0.023 | 945±11.6      | 379.3±24.2        |
| 740            | -0.21±0.017 | 0.35±0.03     | 0.17±0.011  | 2.5±0.3       | 0.41±0.032 | 71.2±2.4      | 0.42±0.028 | 945±11.6      | 422.9±29.1        |
| 750            | -0.28±0.021 | 0.35±0.03     | 0.15±0.011  | 2.5±0.3       | 0.38±0.030 | 71.2±2.4      | 0.47±0.032 | 945±11.6      | 470.1±32.8        |
| 760            | -0.31±0.025 | 0.35±0.03     | 0.14±0.010  | 2.5±0.3       | 0.35±0.028 | 71.2±2.4      | 0.51±0.035 | 945±11.6      | 508.5±35.5        |
| 770            | -0.36±0.027 | 0.35±0.03     | 0.12±0.008  | 2.5±0.3       | 0.33±0.021 | 71.2±2.4      | 0.55±0.038 | 945±11.6      | 543.3±37.9        |
| 830            | -0.42±0.030 | 0.35±0.03     | -0.10±0.007 | 2.5±0.3       | 0.32±0.019 | 71.2±2.4      | 0.68±0.036 | 945±11.6      | 667.3±35.8        |
| 840            | -0.46±0.032 | 0.35±0.03     | -0.14±0.012 | 2.5±0.3       | 0.32±0.017 | 71.2±2.4      | 0.68±0.038 | 945±11.6      | 667.3±37.6        |
| 850            | -0.48±0.033 | 0.35±0.03     | -0.17±0.014 | 2.5±0.3       | 0.32±0.020 | 71.2±2.4      | 0.68±0.033 | 945±11.6      | 667.3±33.0        |
| 860            | -0.50±0.036 | 0.35±0.03     | -0.19±0.013 | 2.5±0.3       | 0.32±0.024 | 71.2±2.4      | 0.68±0.032 | 945±11.6      | 667.3±29.3        |
| 870            | -0.51±0.037 | 0.35±0.03     | -0.21±0.017 | 2.5±0.3       | 0.32±0.026 | 71.2±2.4      | 0.68±0.029 | 945±11.6      | 667.3±32.4        |
| 880            | -0.52±0.035 | 0.35±0.03     | -0.24±0.020 | 2.5±0.3       | 0.32±0.025 | 71.2±2.4      | 0.68±0.031 | 945±11.6      | 667.3±29.7        |
| 890            | -0.52±0.032 | 0.35±0.03     | -0.24±0.018 | 2.5±0.3       | 0.32±0.019 | 71.2±2.4      | 0.68±0.028 | 945±11.6      | 667.3±31.5        |
| 900            | -0.52±0.033 | 0.35±0.03     | -0.24±0.016 | 2.5±0.3       | 0.32±0.018 | 71.2±2.4      | 0.68±0.032 | 945±11.6      | 667.3±28.2        |
| 910            | -0.52±0.037 | 0.35±0.03     | -0.24±0.018 | 2.5±0.3       | 0.32±0.021 | 71.2±2.4      | 0.68±0.029 | 945±11.6      | 667.3±31.9        |

<sup>a</sup> The average lifetime of PL at a certain wavelength was calculated according to eqn.:  $\bar{\tau} = \sum_{i=1}^4 A_i \tau_i / \sum_{i=1}^4 A_i (A_i > 0)$ .

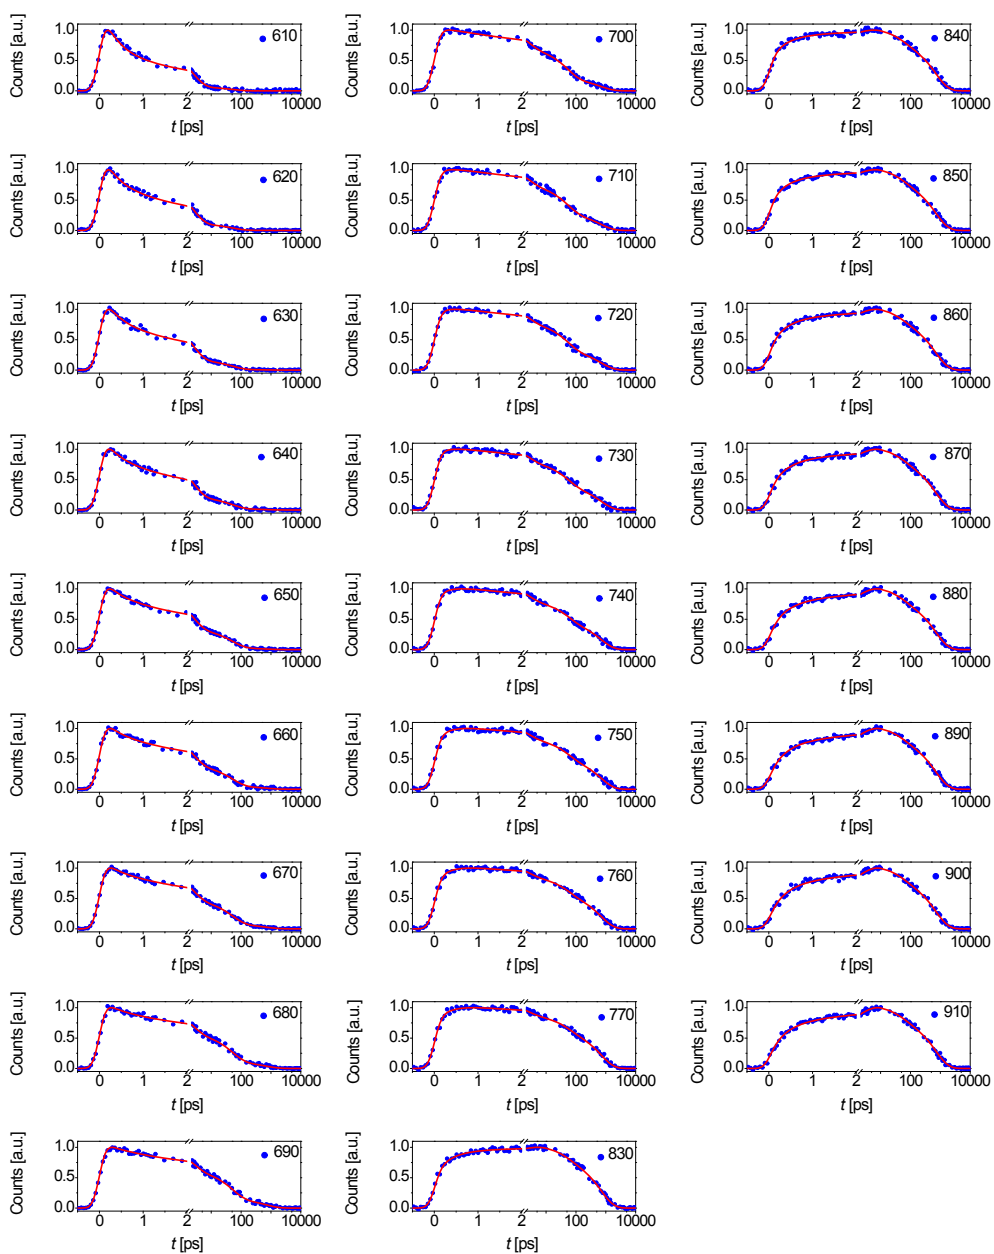

**Fig. S12.** PL traces (blue dots) of a SC-3 grafted alumina film in contact with an electrolyte probed at a series of wavelengths. Note that PL

intensities at different wavelengths have been normalized. The red solid lines are fittings via eqn.:  $I_{PL} = I_0 + \sum_{i=1}^4 A_i \exp(-t / \tau_i) \otimes \text{IRF}$ .

Excitation wavelength: 490 nm.

**Table S7.** Time constants and amplitudes employed to fit PL traces for a **SC-3** grafted alumina film in contact with an electrolyte <sup>a</sup>

| $\lambda$ [nm] | $A_1$       | $\tau_1$ [ps] | $A_2$       | $\tau_2$ [ps] | $A_3$      | $\tau_3$ [ps] | $A_4$      | $\tau_4$ [ps] | $\bar{\tau}$ [ps] |
|----------------|-------------|---------------|-------------|---------------|------------|---------------|------------|---------------|-------------------|
| 610            | 0.52±0.032  | 0.33±0.03     | 0.44±0.032  | 2.3±0.1       | 0.04±0.003 | 51.4±1.2      | 0          | 693.1±9.7     | 3.3±0.2           |
| 620            | 0.43±0.033  | 0.33±0.03     | 0.50±0.032  | 2.3±0.1       | 0.07±0.005 | 51.4±1.2      | 0          | 693.1±9.7     | 6.1±0.3           |
| 630            | 0.35±0.029  | 0.33±0.03     | 0.53±0.036  | 2.3±0.1       | 0.11±0.008 | 51.4±1.2      | 0.01±0.001 | 693.1±9.7     | 11.3±1.1          |
| 640            | 0.31±0.027  | 0.33±0.03     | 0.54±0.029  | 2.3±0.1       | 0.14±0.010 | 51.4±1.2      | 0.01±0.001 | 693.1±9.7     | 18.6±1.2          |
| 650            | 0.25±0.020  | 0.33±0.03     | 0.49±0.031  | 2.3±0.1       | 0.24±0.021 | 51.4±1.2      | 0.02±0.001 | 693.1±9.7     | 28.5±1.8          |
| 660            | 0.20±0.016  | 0.33±0.03     | 0.48±0.033  | 2.3±0.1       | 0.28±0.017 | 51.4±1.2      | 0.04±0.002 | 693.1±9.7     | 42.1±2.3          |
| 670            | 0.15±0.012  | 0.33±0.03     | 0.46±0.028  | 2.3±0.1       | 0.33±0.020 | 51.4±1.2      | 0.06±0.003 | 693.1±9.7     | 61.8±3.2          |
| 680            | 0.11±0.008  | 0.33±0.03     | 0.40±0.027  | 2.3±0.1       | 0.40±0.025 | 51.4±1.2      | 0.09±0.005 | 693.1±9.7     | 85.3±4.8          |
| 690            | 0.06±0.004  | 0.33±0.03     | 0.39±0.025  | 2.3±0.1       | 0.42±0.027 | 51.4±1.2      | 0.13±0.010 | 693.1±9.7     | 114.8±8.4         |
| 700            | -0.07±0.003 | 0.33±0.03     | 0.36±0.020  | 2.3±0.1       | 0.46±0.030 | 51.4±1.2      | 0.18±0.012 | 693.1±9.7     | 149.1±10.0        |
| 710            | -0.14±0.012 | 0.33±0.03     | 0.32±0.023  | 2.3±0.1       | 0.43±0.032 | 51.4±1.2      | 0.25±0.017 | 693.1±9.7     | 195.3±13.6        |
| 720            | -0.16±0.013 | 0.33±0.03     | 0.29±0.021  | 2.3±0.1       | 0.41±0.033 | 51.4±1.2      | 0.30±0.021 | 693.1±9.7     | 226.7±16.5        |
| 730            | -0.19±0.014 | 0.33±0.03     | 0.28±0.019  | 2.3±0.1       | 0.36±0.028 | 51.4±1.2      | 0.36±0.024 | 693.1±9.7     | 265.1±18.3        |
| 740            | -0.25±0.021 | 0.33±0.03     | 0.28±0.021  | 2.3±0.1       | 0.31±0.024 | 51.4±1.2      | 0.41±0.027 | 693.1±9.7     | 300.2±20.2        |
| 750            | -0.32±0.022 | 0.33±0.03     | 0.25±0.020  | 2.3±0.1       | 0.30±0.021 | 51.4±1.2      | 0.45±0.030 | 693.1±9.7     | 325.1±22.2        |
| 760            | -0.34±0.020 | 0.33±0.03     | 0.22±0.016  | 2.3±0.1       | 0.27±0.022 | 51.4±1.2      | 0.51±0.032 | 693.1±9.7     | 365.5±23.6        |
| 770            | -0.35±0.021 | 0.33±0.03     | 0.21±0.014  | 2.3±0.1       | 0.24±0.019 | 51.4±1.2      | 0.55±0.032 | 693.1±9.7     | 397.6±23.5        |
| 830            | -0.40±0.030 | 0.33±0.03     | -0.12±0.008 | 2.3±0.1       | 0.24±0.017 | 51.4±1.2      | 0.76±0.033 | 693.1±9.7     | 537.0±24.1        |
| 840            | -0.42±0.019 | 0.33±0.03     | -0.16±0.011 | 2.3±0.1       | 0.24±0.017 | 51.4±1.2      | 0.76±0.036 | 693.1±9.7     | 537.0±26.2        |
| 850            | -0.44±0.021 | 0.33±0.03     | -0.21±0.013 | 2.3±0.1       | 0.24±0.016 | 51.4±1.2      | 0.76±0.035 | 693.1±9.7     | 537.0±25.4        |
| 860            | -0.46±0.024 | 0.33±0.03     | -0.24±0.014 | 2.3±0.1       | 0.24±0.020 | 51.4±1.2      | 0.76±0.032 | 693.1±9.7     | 537.0±23.5        |
| 870            | -0.48±0.023 | 0.33±0.03     | -0.27±0.017 | 2.3±0.1       | 0.24±0.021 | 51.4±1.2      | 0.76±0.029 | 693.1±9.7     | 537.0±20.5        |
| 880            | -0.49±0.025 | 0.33±0.03     | -0.31±0.019 | 2.3±0.1       | 0.24±0.018 | 51.4±1.2      | 0.76±0.034 | 693.1±9.7     | 537.0±24.8        |
| 890            | -0.49±0.026 | 0.33±0.03     | -0.34±0.020 | 2.3±0.1       | 0.24±0.016 | 51.4±1.2      | 0.76±0.035 | 693.1±9.7     | 537.0±25.4        |
| 900            | -0.49±0.029 | 0.33±0.03     | -0.36±0.022 | 2.3±0.1       | 0.24±0.012 | 51.4±1.2      | 0.76±0.031 | 693.1±9.7     | 537.0±22.4        |
| 910            | -0.49±0.031 | 0.33±0.03     | -0.36±0.024 | 2.3±0.1       | 0.24±0.016 | 51.4±1.2      | 0.76±0.036 | 693.1±9.7     | 537.0±26.1        |

<sup>a</sup> The average lifetime of PL at a certain wavelength was calculated according to eqn.:  $\bar{\tau} = \frac{\sum_{i=1}^4 A_i \tau_i}{\sum_{i=1}^4 A_i (A_i > 0)}$ .



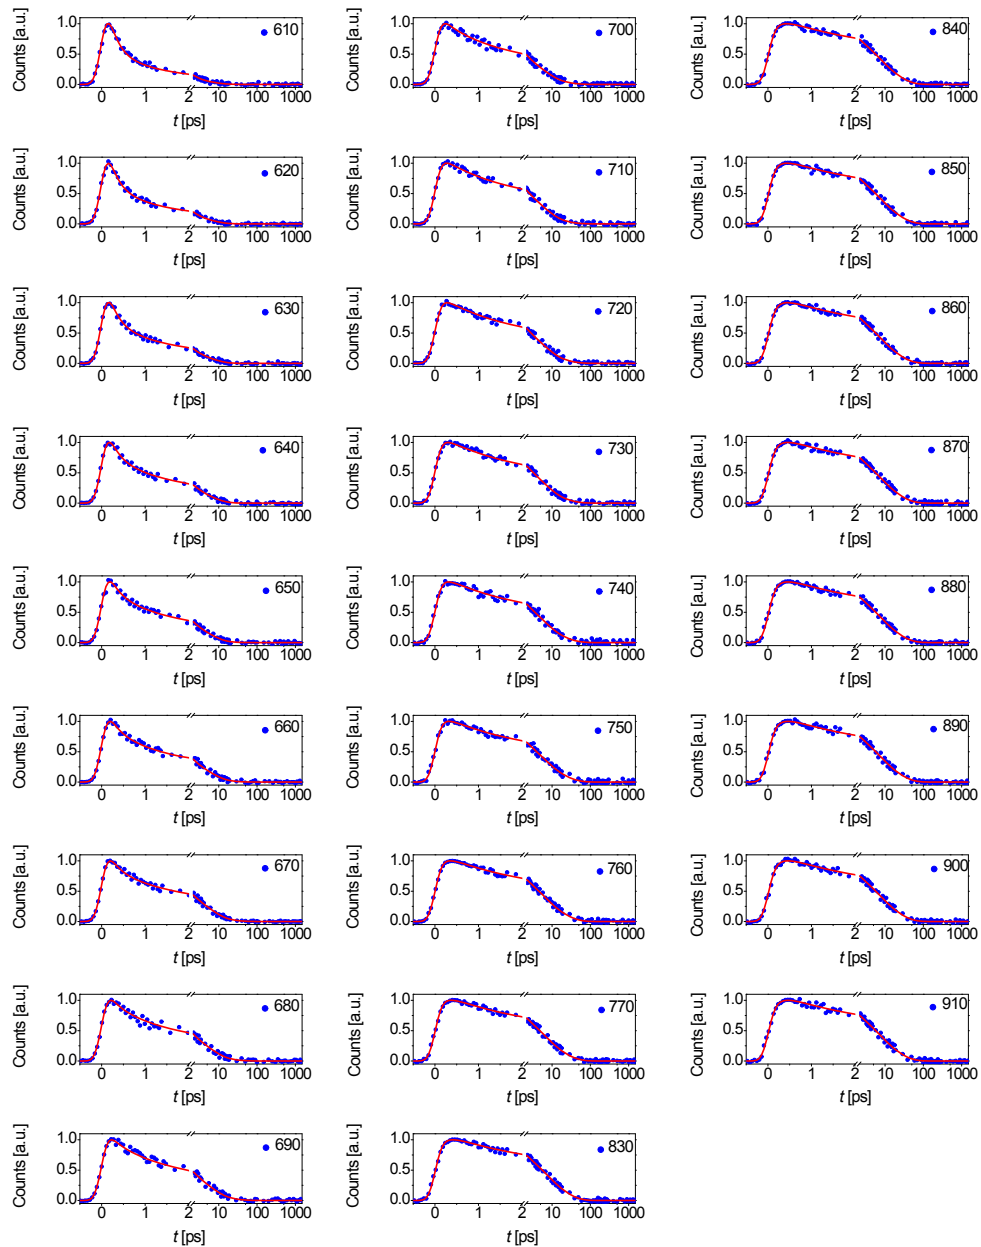

**Fig. S14.** PL traces (blue dots) of a SC-1 grafted titania film in contact with an electrolyte probed at a series of wavelengths. Note that PL

intensities at different wavelengths have been normalized. The red solid lines are fittings via eqn.:  $I_{PL} = I_0 + \sum_{i=1}^4 A_i \exp(-t / \tau_i) \otimes \text{IRF}$ .

Excitation wavelength: 490 nm.

**Table S8.** Time constants and amplitudes employed to fit PL traces for a **SC-1** grafted titania film in contact with an electrolyte <sup>a</sup>

| $\lambda$ [nm] | $A_1$       | $\tau_1$ [ps] | $A_2$      | $\tau_2$ [ps] | $A_3$      | $\tau_3$ [ps] | $A_4$      | $\tau_4$ [ps] | $\bar{\tau}$ [ps] |
|----------------|-------------|---------------|------------|---------------|------------|---------------|------------|---------------|-------------------|
| 610            | 0.73±0.042  | 0.21±0.02     | 0.22±0.017 | 1.1±0.1       | 0.05±0.004 | 5.7±0.2       | 0          | 19.8±0.8      | 0.69±0.02         |
| 620            | 0.68±0.039  | 0.21±0.02     | 0.24±0.016 | 1.1±0.1       | 0.08±0.003 | 5.7±0.2       | 0          | 19.8±0.8      | 0.88±0.02         |
| 630            | 0.63±0.027  | 0.21±0.02     | 0.25±0.020 | 1.1±0.1       | 0.12±0.010 | 5.7±0.2       | 0          | 19.8±0.8      | 1.1±0.06          |
| 640            | 0.52±0.032  | 0.21±0.02     | 0.30±0.022 | 1.1±0.1       | 0.18±0.012 | 5.7±0.2       | 0          | 19.8±0.8      | 1.5±0.07          |
| 650            | 0.44±0.030  | 0.21±0.02     | 0.33±0.026 | 1.1±0.1       | 0.22±0.016 | 5.7±0.2       | 0.01±0.001 | 19.8±0.8      | 1.8±0.1           |
| 660            | 0.39±0.029  | 0.21±0.02     | 0.35±0.028 | 1.1±0.1       | 0.24±0.017 | 5.7±0.2       | 0.02±0.001 | 19.8±0.8      | 2.2±0.1           |
| 670            | 0.34±0.026  | 0.21±0.02     | 0.35±0.031 | 1.1±0.1       | 0.27±0.020 | 5.7±0.2       | 0.04±0.002 | 19.8±0.8      | 2.7±0.2           |
| 680            | 0.26±0.019  | 0.21±0.02     | 0.38±0.030 | 1.1±0.1       | 0.31±0.021 | 5.7±0.2       | 0.05±0.003 | 19.8±0.8      | 3.2±0.3           |
| 690            | 0.15±0.010  | 0.21±0.02     | 0.42±0.032 | 1.1±0.1       | 0.36±0.025 | 5.7±0.2       | 0.07±0.004 | 19.8±0.8      | 3.8±0.2           |
| 700            | 0.09±0.006  | 0.21±0.02     | 0.47±0.033 | 1.1±0.1       | 0.36±0.024 | 5.7±0.2       | 0.09±0.006 | 19.8±0.8      | 4.3±0.4           |
| 710            | -0.10±0.004 | 0.21±0.02     | 0.45±0.034 | 1.1±0.1       | 0.45±0.023 | 5.7±0.2       | 0.10±0.007 | 19.8±0.8      | 5.1±0.3           |
| 720            | -0.14±0.008 | 0.21±0.02     | 0.42±0.031 | 1.1±0.1       | 0.45±0.029 | 5.7±0.2       | 0.13±0.010 | 19.8±0.8      | 5.6±0.3           |
| 730            | -0.19±0.012 | 0.21±0.02     | 0.37±0.029 | 1.1±0.1       | 0.46±0.030 | 5.7±0.2       | 0.17±0.012 | 19.8±0.8      | 6.3±0.4           |
| 740            | -0.23±0.017 | 0.21±0.02     | 0.36±0.027 | 1.1±0.1       | 0.44±0.032 | 5.7±0.2       | 0.20±0.014 | 19.8±0.8      | 6.9±0.4           |
| 750            | -0.26±0.016 | 0.21±0.02     | 0.34±0.028 | 1.1±0.1       | 0.41±0.027 | 5.7±0.2       | 0.25±0.017 | 19.8±0.8      | 7.6±0.5           |
| 760            | -0.31±0.020 | 0.21±0.02     | 0.30±0.025 | 1.1±0.1       | 0.42±0.026 | 5.7±0.2       | 0.28±0.021 | 19.8±0.8      | 8.3±0.5           |
| 770            | -0.36±0.022 | 0.21±0.02     | 0.29±0.022 | 1.1±0.1       | 0.41±0.027 | 5.7±0.2       | 0.30±0.024 | 19.8±0.8      | 8.6±0.6           |
| 830            | -0.41±0.028 | 0.21±0.02     | 0.26±0.021 | 1.1±0.1       | 0.38±0.021 | 5.7±0.2       | 0.36±0.021 | 19.8±0.8      | 9.6±0.6           |
| 840            | -0.43±0.030 | 0.21±0.02     | 0.26±0.020 | 1.1±0.1       | 0.38±0.019 | 5.7±0.2       | 0.36±0.019 | 19.8±0.8      | 9.6±0.5           |
| 850            | -0.45±0.032 | 0.21±0.02     | 0.26±0.021 | 1.1±0.1       | 0.38±0.019 | 5.7±0.2       | 0.36±0.021 | 19.8±0.8      | 9.6±0.5           |
| 860            | -0.48±0.031 | 0.21±0.02     | 0.26±0.020 | 1.1±0.1       | 0.38±0.023 | 5.7±0.2       | 0.36±0.023 | 19.8±0.8      | 9.6±0.6           |
| 870            | -0.49±0.033 | 0.21±0.02     | 0.26±0.023 | 1.1±0.1       | 0.38±0.022 | 5.7±0.2       | 0.36±0.020 | 19.8±0.8      | 9.6±0.7           |
| 880            | -0.50±0.038 | 0.21±0.02     | 0.26±0.022 | 1.1±0.1       | 0.38±0.023 | 5.7±0.2       | 0.36±0.017 | 19.8±0.8      | 9.6±0.7           |
| 890            | -0.51±0.036 | 0.21±0.02     | 0.26±0.017 | 1.1±0.1       | 0.38±0.025 | 5.7±0.2       | 0.36±0.019 | 19.8±0.8      | 9.6±0.6           |
| 900            | -0.51±0.029 | 0.21±0.02     | 0.26±0.016 | 1.1±0.1       | 0.38±0.017 | 5.7±0.2       | 0.36±0.021 | 19.8±0.8      | 9.6±0.8           |
| 910            | -0.51±0.030 | 0.21±0.02     | 0.26±0.018 | 1.1±0.1       | 0.38±0.021 | 5.7±0.2       | 0.36±0.016 | 19.8±0.8      | 9.6±0.6           |

<sup>a</sup> The average lifetime of PL at a certain wavelength was calculated according to eqn.:  $\bar{\tau} = \frac{\sum_{i=1}^4 A_i \tau_i}{\sum_{i=1}^4 A_i (A_i > 0)}$ .

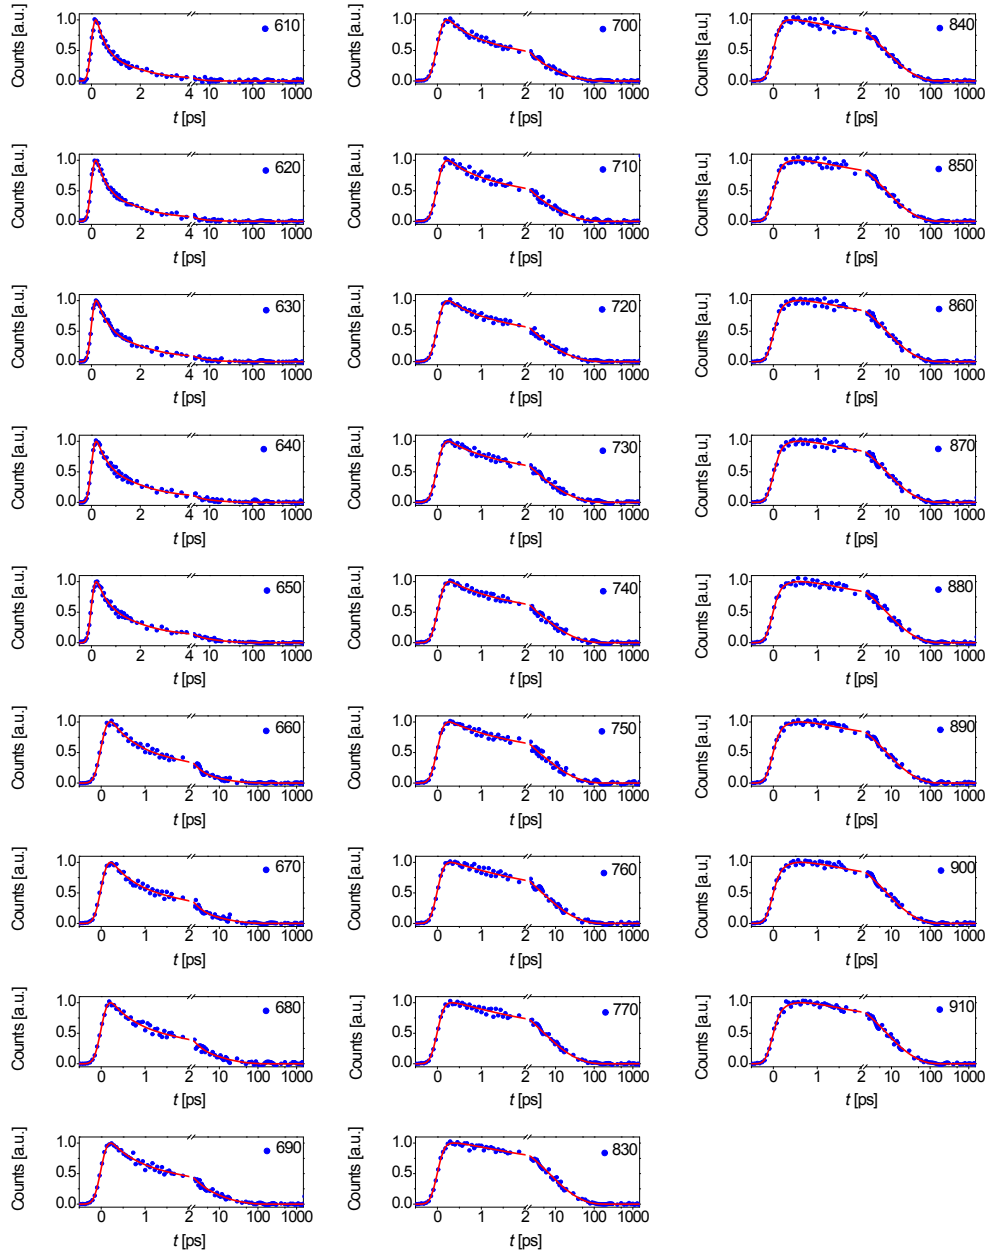

**Fig. S14.** PL traces (blue dots) of a SC-2 grafted titania film in contact with an electrolyte probed at a series of wavelengths. Note that PL

intensities at different wavelengths have been normalized. The red solid lines are fittings via eqn.:  $I_{\text{PL}} = I_0 + \sum_{i=1}^4 A_i \exp(-t / \tau_i) \otimes \text{IRF}$ .

Excitation wavelength: 490 nm.

**Table S9.** Time constants and amplitudes employed to fit PL traces for a SC-2 grafted titania film in contact with an electrolyte <sup>a</sup>

| $\lambda$ [nm] | $A_1$       | $\tau_1$ [ps] | $A_2$      | $\tau_2$ [ps] | $A_3$      | $\tau_3$ [ps] | $A_4$      | $\tau_4$ [ps] | $\bar{\tau}$ [ps] |
|----------------|-------------|---------------|------------|---------------|------------|---------------|------------|---------------|-------------------|
| 610            | 0.58±0.034  | 0.28±0.03     | 0.40±0.028 | 1.4±0.1       | 0.02±0.001 | 6.6±0.4       | 0          | 28.1±1.1      | 0.82±0.01         |
| 620            | 0.51±0.028  | 0.28±0.03     | 0.45±0.029 | 1.4±0.1       | 0.03±0.002 | 6.6±0.4       | 0.01±0.001 | 28.1±1.1      | 1.1±0.04          |
| 630            | 0.45±0.035  | 0.28±0.03     | 0.49±0.033 | 1.4±0.1       | 0.05±0.003 | 6.6±0.4       | 0.01±0.001 | 28.1±1.1      | 1.4±0.05          |
| 640            | 0.40±0.027  | 0.28±0.03     | 0.52±0.035 | 1.4±0.1       | 0.06±0.004 | 6.6±0.4       | 0.02±0.001 | 28.1±1.1      | 1.7±0.06          |
| 650            | 0.39±0.025  | 0.28±0.03     | 0.51±0.037 | 1.4±0.1       | 0.07±0.005 | 6.6±0.4       | 0.03±0.002 | 28.1±1.1      | 2.2±0.09          |
| 660            | 0.35±0.021  | 0.28±0.03     | 0.51±0.028 | 1.4±0.1       | 0.09±0.007 | 6.6±0.4       | 0.05±0.003 | 28.1±1.1      | 2.7±0.1           |
| 670            | 0.33±0.020  | 0.28±0.03     | 0.51±0.029 | 1.4±0.1       | 0.10±0.004 | 6.6±0.4       | 0.06±0.003 | 28.1±1.1      | 3.2±0.1           |
| 680            | 0.31±0.021  | 0.28±0.03     | 0.49±0.032 | 1.4±0.1       | 0.12±0.008 | 6.6±0.4       | 0.08±0.004 | 28.1±1.1      | 3.8±0.2           |
| 690            | 0.26±0.019  | 0.28±0.03     | 0.46±0.032 | 1.4±0.1       | 0.18±0.011 | 6.6±0.4       | 0.10±0.006 | 28.1±1.1      | 4.6±0.3           |
| 700            | 0.24±0.016  | 0.28±0.03     | 0.43±0.021 | 1.4±0.1       | 0.20±0.013 | 6.6±0.4       | 0.13±0.010 | 28.1±1.1      | 5.5±0.4           |
| 710            | 0.19±0.013  | 0.28±0.03     | 0.41±0.029 | 1.4±0.1       | 0.25±0.017 | 6.6±0.4       | 0.15±0.011 | 28.1±1.1      | 6.6±0.4           |
| 720            | 0.16±0.012  | 0.28±0.03     | 0.39±0.030 | 1.4±0.1       | 0.28±0.019 | 6.6±0.4       | 0.17±0.012 | 28.1±1.1      | 7.3±0.5           |
| 730            | 0.11±0.009  | 0.28±0.03     | 0.38±0.031 | 1.4±0.1       | 0.31±0.021 | 6.6±0.4       | 0.20±0.013 | 28.1±1.1      | 8.3±0.6           |
| 740            | 0.07±0.005  | 0.28±0.03     | 0.38±0.030 | 1.4±0.1       | 0.33±0.023 | 6.6±0.4       | 0.22±0.015 | 28.1±1.1      | 9.0±0.6           |
| 750            | 0.03±0.002  | 0.28±0.03     | 0.37±0.031 | 1.4±0.1       | 0.36±0.025 | 6.6±0.4       | 0.24±0.016 | 28.1±1.1      | 9.8±0.7           |
| 760            | -0.11±0.006 | 0.28±0.03     | 0.34±0.028 | 1.4±0.1       | 0.40±0.024 | 6.6±0.4       | 0.26±0.017 | 28.1±1.1      | 10.4±0.8          |
| 770            | -0.17±0.012 | 0.28±0.03     | 0.31±0.027 | 1.4±0.1       | 0.42±0.030 | 6.6±0.4       | 0.27±0.021 | 28.1±1.1      | 10.9±0.9          |
| 830            | -0.20±0.015 | 0.28±0.03     | 0.19±0.015 | 1.4±0.1       | 0.45±0.031 | 6.6±0.4       | 0.36±0.026 | 28.1±1.1      | 13.3±0.9          |
| 840            | -0.24±0.018 | 0.28±0.03     | 0.19±0.013 | 1.4±0.1       | 0.45±0.032 | 6.6±0.4       | 0.36±0.024 | 28.1±1.1      | 13.3±0.8          |
| 850            | -0.30±0.023 | 0.28±0.03     | 0.19±0.012 | 1.4±0.1       | 0.45±0.030 | 6.6±0.4       | 0.36±0.022 | 28.1±1.1      | 13.3±1.0          |
| 860            | -0.39±0.023 | 0.28±0.03     | 0.19±0.017 | 1.4±0.1       | 0.45±0.029 | 6.6±0.4       | 0.36±0.026 | 28.1±1.1      | 13.3±1.1          |
| 870            | -0.44±0.026 | 0.28±0.03     | 0.19±0.015 | 1.4±0.1       | 0.45±0.032 | 6.6±0.4       | 0.36±0.025 | 28.1±1.1      | 13.3±1.0          |
| 880            | -0.48±0.031 | 0.28±0.03     | 0.19±0.014 | 1.4±0.1       | 0.45±0.031 | 6.6±0.4       | 0.36±0.027 | 28.1±1.1      | 13.3±0.9          |
| 890            | -0.50±0.021 | 0.28±0.03     | 0.19±0.015 | 1.4±0.1       | 0.45±0.028 | 6.6±0.4       | 0.36±0.030 | 28.1±1.1      | 13.3±1.0          |
| 900            | -0.54±0.033 | 0.28±0.03     | 0.19±0.016 | 1.4±0.1       | 0.45±0.027 | 6.6±0.4       | 0.36±0.031 | 28.1±1.1      | 13.3±1.1          |
| 910            | -0.54±0.034 | 0.28±0.03     | 0.19±0.017 | 1.4±0.1       | 0.45±0.029 | 6.6±0.4       | 0.36±0.032 | 28.1±1.1      | 13.3±1.1          |

<sup>a</sup> The average lifetime of PL at a certain wavelength was calculated according to eqn.:  $\bar{\tau} = \frac{\sum_{i=1}^4 A_i \tau_i}{\sum_{i=1}^4 A_i (A_i > 0)}$ .

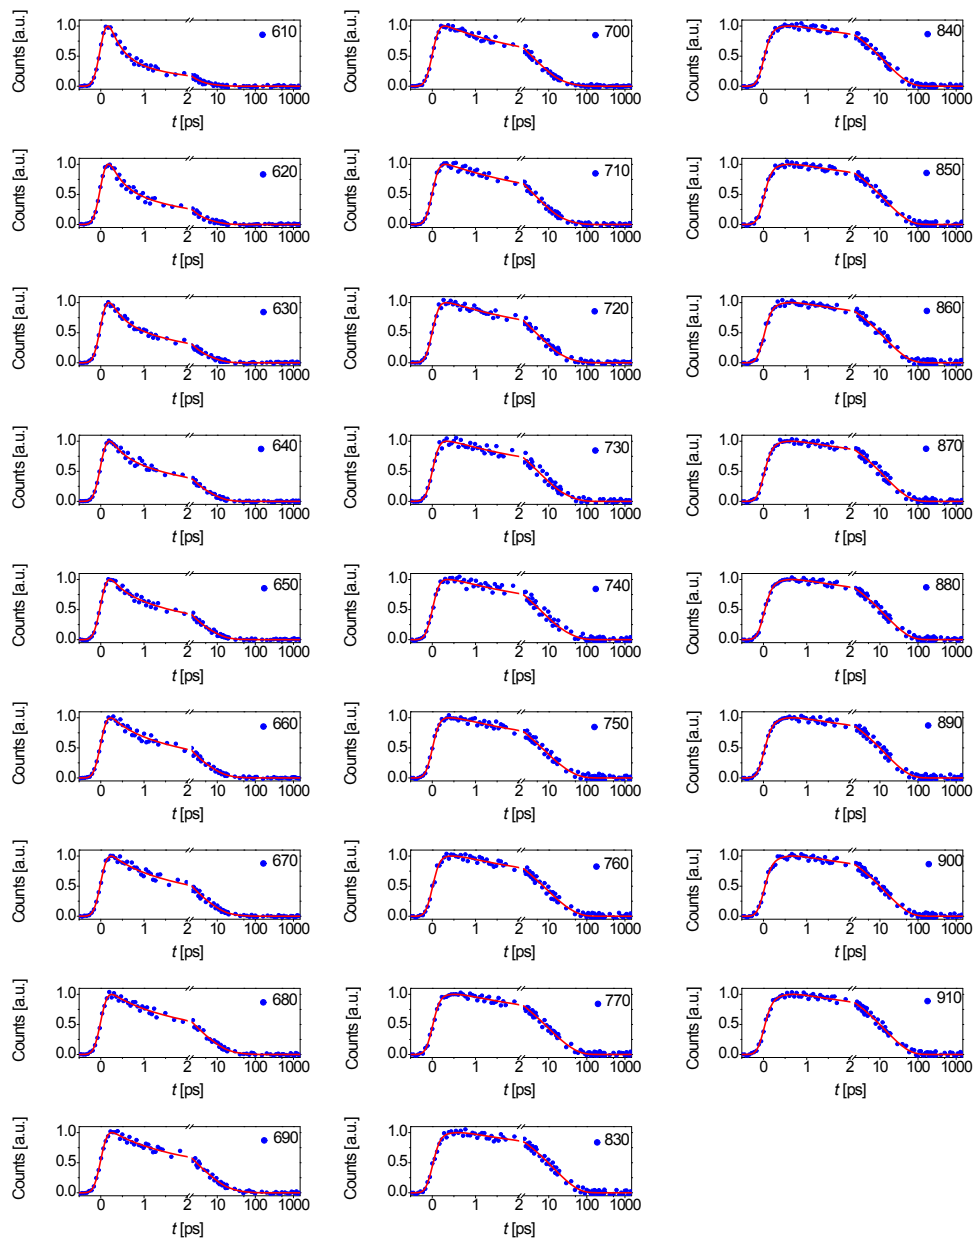

**Fig. S15.** PL traces (blue dots) of a **SC-3** grafted titania film in contact with an electrolyte probed at a series of wavelengths. Note that PL

intensities at different wavelengths have been normalized. The red solid lines are fittings via eqn.:  $I_{\text{PL}} = I_0 + \sum_{i=1}^4 A_i \exp(-t/\tau_i) \otimes \text{IRF}$ .

Excitation wavelength: 490 nm.

**Table S10.** Time constants and amplitudes employed to fit PL traces for a **SC-3** grafted titania film in contact with an electrolyte <sup>a</sup>

| $\lambda$ [nm] | $A_1$        | $\tau_1$ [ps] | $A_2$      | $\tau_2$ [ps] | $A_3$      | $\tau_3$ [ps] | $A_4$      | $\tau_4$ [ps] | $\bar{\tau}$ [ps] |
|----------------|--------------|---------------|------------|---------------|------------|---------------|------------|---------------|-------------------|
| 610            | 0.69±0.035   | 0.27±0.02     | 0.26±0.021 | 1.3±0.1       | 0.05±0.004 | 6.4±0.3       | 0          | 25.9±1.2      | 0.85±0.03         |
| 620            | 0.54±0.042   | 0.27±0.02     | 0.35±0.022 | 1.3±0.1       | 0.11±0.005 | 6.4±0.3       | 0          | 25.9±1.2      | 1.3±0.03          |
| 630            | 0.47±0.031   | 0.27±0.02     | 0.36±0.027 | 1.3±0.1       | 0.17±0.012 | 6.4±0.3       | 0          | 25.9±1.2      | 1.7±0.08          |
| 640            | 0.38±0.028   | 0.27±0.02     | 0.36±0.025 | 1.3±0.1       | 0.25±0.020 | 6.4±0.3       | 0.01±0.001 | 25.9±1.2      | 2.3±0.2           |
| 650            | 0.29±0.024   | 0.27±0.02     | 0.40±0.021 | 1.3±0.1       | 0.29±0.022 | 6.4±0.3       | 0.02±0.001 | 25.9±1.2      | 2.8±0.2           |
| 660            | 0.19±0.016   | 0.27±0.02     | 0.45±0.032 | 1.3±0.1       | 0.33±0.027 | 6.4±0.3       | 0.03±0.002 | 25.9±1.2      | 3.5±0.3           |
| 670            | 0.12±0.010   | 0.27±0.02     | 0.45±0.030 | 1.3±0.1       | 0.38±0.025 | 6.4±0.3       | 0.05±0.003 | 25.9±1.2      | 4.4±0.2           |
| 680            | 0.07±0.005   | 0.27±0.02     | 0.43±0.031 | 1.3±0.1       | 0.42±0.023 | 6.4±0.3       | 0.08±0.005 | 25.9±1.2      | 5.4±0.3           |
| 690            | 0.05±0.004   | 0.27±0.02     | 0.40±0.027 | 1.3±0.1       | 0.44±0.023 | 6.4±0.3       | 0.11±0.007 | 25.9±1.2      | 6.3±0.4           |
| 700            | -0.07±0.005  | 0.27±0.02     | 0.36±0.026 | 1.3±0.1       | 0.48±0.030 | 6.4±0.3       | 0.16±0.013 | 25.9±1.2      | 7.6±0.6           |
| 710            | -0.10±0.007  | 0.27±0.02     | 0.31±0.020 | 1.3±0.1       | 0.50±0.034 | 6.4±0.3       | 0.19±0.013 | 25.9±1.2      | 8.5±0.6           |
| 720            | -0.15±0.011  | 0.27±0.02     | 0.29±0.021 | 1.3±0.1       | 0.49±0.032 | 6.4±0.3       | 0.22±0.015 | 25.9±1.2      | 9.3±0.7           |
| 730            | -0.18±0.012  | 0.27±0.02     | 0.27±0.022 | 1.3±0.1       | 0.45±0.030 | 6.4±0.3       | 0.28±0.017 | 25.9±1.2      | 10.4±0.8          |
| 740            | -0.21±0.016  | 0.27±0.02     | 0.27±0.020 | 1.3±0.1       | 0.41±0.031 | 6.4±0.3       | 0.32±0.021 | 25.9±1.2      | 11.4±0.8          |
| 750            | -0.26±0.020  | 0.27±0.02     | 0.26±0.021 | 1.3±0.1       | 0.37±0.028 | 6.4±0.3       | 0.37±0.024 | 25.9±1.2      | 12.3±0.9          |
| 760            | -0.31±0.026  | 0.27±0.02     | 0.24±0.018 | 1.3±0.1       | 0.36±0.024 | 6.4±0.3       | 0.40±0.027 | 25.9±1.2      | 13.1±1.0          |
| 770            | -0.36±0.021  | 0.27±0.02     | 0.22±0.016 | 1.3±0.1       | 0.35±0.020 | 6.4±0.3       | 0.43±0.030 | 25.9±1.2      | 13.7±1.0          |
| 830            | -0.39±0.023  | 0.27±0.02     | 0.17±0.012 | 1.3±0.1       | 0.30±0.019 | 6.4±0.3       | 0.53±0.031 | 25.9±1.2      | 15.8±1.0          |
| 840            | -0.41±0.026  | 0.27±0.02     | 0.17±0.013 | 1.3±0.1       | 0.30±0.021 | 6.4±0.3       | 0.53±0.032 | 25.9±1.2      | 15.8±1.1          |
| 850            | -0.43±0.027  | 0.27±0.02     | 0.17±0.012 | 1.3±0.1       | 0.30±0.022 | 6.4±0.3       | 0.53±0.033 | 25.9±1.2      | 15.8±1.2          |
| 860            | -0.44±0.030  | 0.27±0.02     | 0.17±0.011 | 1.3±0.1       | 0.30±0.024 | 6.4±0.3       | 0.53±0.035 | 25.9±1.2      | 15.8±1.2          |
| 870            | -0.46±0.032  | 0.27±0.02     | 0.17±0.015 | 1.3±0.1       | 0.30±0.022 | 6.4±0.3       | 0.53±0.038 | 25.9±1.2      | 15.8±1.1          |
| 880            | -0.49±0.031  | 0.27±0.02     | 0.17±0.012 | 1.3±0.1       | 0.30±0.021 | 6.4±0.3       | 0.53±0.040 | 25.9±1.2      | 15.8±1.1          |
| 890            | -0.51±10.035 | 0.27±0.02     | 0.17±0.013 | 1.3±0.1       | 0.30±0.019 | 6.4±0.3       | 0.53±0.037 | 25.9±1.2      | 15.8±1.1          |
| 900            | -0.52±0.036  | 0.27±0.02     | 0.17±0.014 | 1.3±0.1       | 0.30±0.022 | 6.4±0.3       | 0.53±0.035 | 25.9±1.2      | 15.8±1.0          |
| 910            | -0.52±0.032  | 0.27±0.02     | 0.17±0.015 | 1.3±0.1       | 0.30±0.019 | 6.4±0.3       | 0.53±0.032 | 25.9±1.2      | 15.8±1.0          |

<sup>a</sup> The average lifetime of PL at a certain wavelength was calculated according to eqn.:  $\bar{\tau} = \sum_{i=1}^4 A_i \tau_i / \sum_{i=1}^4 A_i (A_i > 0)$ .

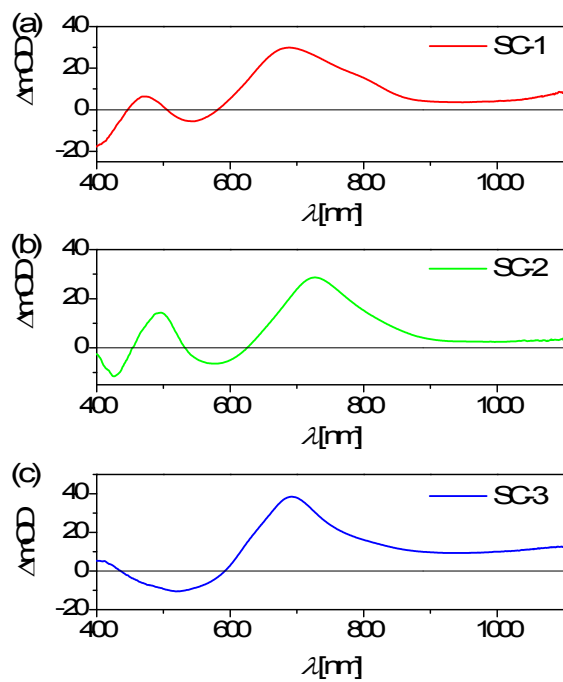

**Fig. S16.** Wavelength-dependent absorption change upon applying a positive potential bias to a 1.2- $\mu\text{m}$ -thick, dye-grafted titania film immersed in EMITFSI.
